# Supplementary material for: Revealing the Mechanism of Huazhi Rougan Granule in the Treatment of Nonalcoholic Fatty Liver Through Intestinal Flora Based on 16S rRNA, Metagenomic Sequencing and Network Pharmacology
Source: Front Pharmacol. 2022 Apr 26;13:875700. doi: 10.3389/fphar.2022.875700 (PMC9086680; doi:10.3389/fphar.2022.875700)
Supplement: Supplementary file 7 [file Table5.XLSX]

## Sheet: Sheet1
Additional file 5 Information of GO Function Enrichment Analysis
ONTOLOGY	ID	Description	GeneRatio	BgRatio	pvalue	p.adjust	qvalue	geneID	Count
BP	GO:0006809	nitric oxide biosynthetic process	11/37	77/18670	2.18782e-18	5.44549e-15	1.88153e-15	AKT1/NOS3/NOS1/PTGS2/NOS2/IL1B/ICAM1/MTOR/IFNG/IL10/TNF	11
BP	GO:0046209	nitric oxide metabolic process	11/37	82/18670	4.55565e-18	5.66951e-15	1.95893e-15	AKT1/NOS3/NOS1/PTGS2/NOS2/IL1B/ICAM1/MTOR/IFNG/IL10/TNF	11
BP	GO:2001057	reactive nitrogen species metabolic process	11/37	85/18670	6.91464e-18	5.73685e-15	1.9822e-15	AKT1/NOS3/NOS1/PTGS2/NOS2/IL1B/ICAM1/MTOR/IFNG/IL10/TNF	11
BP	GO:0042136	neurotransmitter biosynthetic process	11/37	106/18670	8.77026e-17	5.45729e-14	1.88561e-14	AKT1/NOS3/NOS1/PTGS2/NOS2/IL1B/ICAM1/MTOR/IFNG/IL10/TNF	11
BP	GO:0072593	reactive oxygen species metabolic process	14/37	284/18670	1.15118e-16	5.73058e-14	1.98003e-14	AKT1/F2/NOS3/NOS1/CRP/PTGS2/NCF1/NOS2/IL1B/ICAM1/MTOR/IFNG/IL10/TNF	14
BP	GO:1903409	reactive oxygen species biosynthetic process	11/37	122/18670	4.33711e-16	1.79918e-13	6.21653e-14	AKT1/NOS3/NOS1/PTGS2/NOS2/IL1B/ICAM1/MTOR/IFNG/IL10/TNF	11
BP	GO:0002237	response to molecule of bacterial origin	14/37	343/18670	1.59792e-15	5.68175e-13	1.96316e-13	AKT1/C5AR1/NOS3/NOS1/PTGS2/TLR9/CXCL10/CXCL8/NOS2/IL1B/ICAM1/IL10/IL6/TNF	14
BP	GO:0050727	regulation of inflammatory response	14/37	374/18670	5.2929e-15	1.53171e-12	5.29238e-13	F2/PLA2G2A/PTGS2/TLR9/NOS2/IL1B/TGM2/MMP9/IL2/IL10/IL6/PPARG/IL4/TNF	14
BP	GO:0042133	neurotransmitter metabolic process	11/37	153/18670	5.53853e-15	1.53171e-12	5.29238e-13	AKT1/NOS3/NOS1/PTGS2/NOS2/IL1B/ICAM1/MTOR/IFNG/IL10/TNF	11
BP	GO:0032496	response to lipopolysaccharide	13/37	330/18670	3.16012e-14	7.86554e-12	2.7177e-12	AKT1/C5AR1/NOS3/NOS1/PTGS2/CXCL10/CXCL8/NOS2/IL1B/ICAM1/IL10/IL6/TNF	13
BP	GO:0062013	positive regulation of small molecule metabolic process	10/37	141/18670	1.27905e-13	2.89414e-11	9.99985e-12	AKT1/NOS3/NOS1/PTGS2/NOS2/IL1B/IFNG/PPARG/IL4/TNF	10
BP	GO:2000379	positive regulation of reactive oxygen species metabolic process	9/37	102/18670	3.31422e-13	6.87425e-11	2.37519e-11	AKT1/F2/CRP/PTGS2/IL1B/ICAM1/MTOR/IFNG/TNF	9
BP	GO:0045428	regulation of nitric oxide biosynthetic process	8/37	66/18670	5.59795e-13	9.98075e-11	3.44855e-11	AKT1/PTGS2/IL1B/ICAM1/MTOR/IFNG/IL10/TNF	8
BP	GO:0002526	acute inflammatory response	9/37	108/18670	5.61392e-13	9.98075e-11	3.44855e-11	F2/CRP/PTGS2/IL1A/IL1B/ICAM1/IL6/PPARG/TNF	9
BP	GO:0048660	regulation of smooth muscle cell proliferation	10/37	169/18670	7.9694e-13	1.32239e-10	4.56912e-11	AKT1/PTGS2/TGM2/MTOR/MMP9/IFNG/IL10/IL6/PPARG/TNF	10
BP	GO:0048659	smooth muscle cell proliferation	10/37	171/18670	8.96963e-13	1.39534e-10	4.82117e-11	AKT1/PTGS2/TGM2/MTOR/MMP9/IFNG/IL10/IL6/PPARG/TNF	10
BP	GO:0150076	neuroinflammatory response	8/37	75/18670	1.62396e-12	2.37767e-10	8.21533e-11	C5AR1/PTGS2/IL1B/MMP9/IFNG/IL6/IL4/TNF	8
BP	GO:0045429	positive regulation of nitric oxide biosynthetic process	7/37	43/18670	2.01243e-12	2.78274e-10	9.61494e-11	AKT1/PTGS2/IL1B/ICAM1/MTOR/IFNG/TNF	7
BP	GO:0002697	regulation of immune effector process	13/37	462/18670	2.28911e-12	2.97409e-10	1.02761e-10	F2/C5AR1/CD40LG/TLR9/NOS2/IL1B/ICAM1/IFNG/IL2/IL10/IL6/IL4/TNF	13
BP	GO:1904407	positive regulation of nitric oxide metabolic process	7/37	44/18670	2.38979e-12	2.97409e-10	1.02761e-10	AKT1/PTGS2/IL1B/ICAM1/MTOR/IFNG/TNF	7
BP	GO:0050708	regulation of protein secretion	13/37	472/18670	2.99815e-12	3.55352e-10	1.22781e-10	CD40LG/CFTR/CRP/TLR9/IL1A/NOS2/IL1B/IFNG/IL2/IL10/IL6/HNF4A/TNF	13
BP	GO:2000377	regulation of reactive oxygen species metabolic process	10/37	195/18670	3.34137e-12	3.7803e-10	1.30617e-10	AKT1/F2/CRP/PTGS2/IL1B/ICAM1/MTOR/IFNG/IL10/TNF	10
BP	GO:0006953	acute-phase response	7/37	47/18670	3.90557e-12	4.2265e-10	1.46034e-10	F2/CRP/PTGS2/IL1A/IL1B/IL6/TNF	7
BP	GO:0071222	cellular response to lipopolysaccharide	10/37	205/18670	5.50058e-12	5.70456e-10	1.97104e-10	AKT1/NOS3/CXCL10/CXCL8/NOS2/IL1B/ICAM1/IL10/IL6/TNF	10
BP	GO:0002791	regulation of peptide secretion	13/37	500/18670	6.18682e-12	6.1596e-10	2.12827e-10	CD40LG/CFTR/CRP/TLR9/IL1A/NOS2/IL1B/IFNG/IL2/IL10/IL6/HNF4A/TNF	13
BP	GO:0071219	cellular response to molecule of bacterial origin	10/37	212/18670	7.68146e-12	7.35352e-10	2.54079e-10	AKT1/NOS3/CXCL10/CXCL8/NOS2/IL1B/ICAM1/IL10/IL6/TNF	10
BP	GO:0045785	positive regulation of cell adhesion	12/37	403/18670	9.89699e-12	9.12356e-10	3.15237e-10	AKT1/CD40LG/IL1B/ICAM1/TGM2/IFNG/IL2/IL10/IL6/RET/IL4/TNF	12
BP	GO:0051235	maintenance of location	11/37	315/18670	1.5332e-11	1.36291e-09	4.70913e-10	AKT1/ALB/F2/NOS1/CRP/CXCL10/IL1B/IL10/IL6/PPARG/TNF	11
BP	GO:1903428	positive regulation of reactive oxygen species biosynthetic process	7/37	57/18670	1.61886e-11	1.38943e-09	4.80077e-10	AKT1/PTGS2/IL1B/ICAM1/MTOR/IFNG/TNF	7
BP	GO:0048661	positive regulation of smooth muscle cell proliferation	8/37	101/18670	1.87648e-11	1.50663e-09	5.20572e-10	AKT1/PTGS2/TGM2/MTOR/MMP9/IL10/IL6/TNF	8
BP	GO:1903426	regulation of reactive oxygen species biosynthetic process	8/37	101/18670	1.87648e-11	1.50663e-09	5.20572e-10	AKT1/PTGS2/IL1B/ICAM1/MTOR/IFNG/IL10/TNF	8
BP	GO:0071216	cellular response to biotic stimulus	10/37	236/18670	2.22343e-11	1.72941e-09	5.97546e-10	AKT1/NOS3/CXCL10/CXCL8/NOS2/IL1B/ICAM1/IL10/IL6/TNF	10
BP	GO:0033002	muscle cell proliferation	10/37	239/18670	2.51896e-11	1.8999e-09	6.56455e-10	AKT1/PTGS2/TGM2/MTOR/MMP9/IFNG/IL10/IL6/PPARG/TNF	10
BP	GO:0002637	regulation of immunoglobulin production	7/37	63/18670	3.35921e-11	2.45914e-09	8.49683e-10	CD40LG/TLR9/IL2/IL10/IL6/IL4/TNF	7
BP	GO:0022409	positive regulation of cell-cell adhesion	10/37	255/18670	4.77178e-11	3.39342e-09	1.1725e-09	AKT1/CD40LG/IL1B/ICAM1/IFNG/IL2/IL10/IL6/IL4/TNF	10
BP	GO:0042035	regulation of cytokine biosynthetic process	8/37	114/18670	5.01869e-11	3.41999e-09	1.18167e-09	TLR9/IL1A/IL1B/IFNG/IL10/IL6/IL4/TNF	8
BP	GO:0001819	positive regulation of cytokine production	12/37	464/18670	5.08395e-11	3.41999e-09	1.18167e-09	C5AR1/CD40LG/PTGS2/TLR9/IL1A/IL1B/IFNG/IL2/IL10/IL6/IL4/TNF	12
BP	GO:0001505	regulation of neurotransmitter levels	11/37	355/18670	5.53258e-11	3.62384e-09	1.25211e-09	AKT1/NOS3/NOS1/PTGS2/NOS2/IL1B/ICAM1/MTOR/IFNG/IL10/TNF	11
BP	GO:0002460	adaptive immune response based on somatic recombination of immune receptors built from immunoglobulin superfamily domains	11/37	361/18670	6.61848e-11	4.22395e-09	1.45946e-09	CD40LG/CRP/IL1B/PRF1/ICAM1/MTOR/IL2/IL10/IL6/IL4/TNF	11
BP	GO:0042089	cytokine biosynthetic process	8/37	123/18670	9.27518e-11	5.77148e-09	1.99416e-09	TLR9/IL1A/IL1B/IFNG/IL10/IL6/IL4/TNF	8
BP	GO:0042107	cytokine metabolic process	8/37	124/18670	9.90111e-11	6.0107e-09	2.07682e-09	TLR9/IL1A/IL1B/IFNG/IL10/IL6/IL4/TNF	8
BP	GO:0050900	leukocyte migration	12/37	499/18670	1.176e-10	6.96917e-09	2.40799e-09	AKT1/CALCA/F2/C5AR1/CXCL10/CXCL8/IL1B/ICAM1/IL10/IL6/RET/TNF	12
BP	GO:0150077	regulation of neuroinflammatory response	6/37	41/18670	1.692e-10	9.79392e-09	3.384e-09	PTGS2/IL1B/MMP9/IL6/IL4/TNF	6
BP	GO:0046425	regulation of receptor signaling pathway via JAK-STAT	8/37	137/18670	2.2076e-10	1.2488e-08	4.31486e-09	F2/IFNG/IL2/IL10/IL6/RET/IL4/TNF	8
BP	GO:0002700	regulation of production of molecular mediator of immune response	8/37	139/18670	2.47967e-10	1.37154e-08	4.73893e-09	CD40LG/TLR9/IL1B/IL2/IL10/IL6/IL4/TNF	8
BP	GO:1903037	regulation of leukocyte cell-cell adhesion	10/37	304/18670	2.66907e-10	1.4442e-08	4.98999e-09	AKT1/CD40LG/IL1B/ICAM1/IFNG/IL2/IL10/IL6/IL4/TNF	10
BP	GO:0010001	glial cell differentiation	9/37	218/18670	3.20412e-10	1.66147e-08	5.74072e-09	AKT1/F2/C5AR1/IL1B/MTOR/IFNG/IL6/PPARG/TNF	9
BP	GO:1903039	positive regulation of leukocyte cell-cell adhesion	9/37	218/18670	3.20412e-10	1.66147e-08	5.74072e-09	AKT1/CD40LG/IL1B/ICAM1/IFNG/IL2/IL6/IL4/TNF	9
BP	GO:0045834	positive regulation of lipid metabolic process	8/37	146/18670	3.67475e-10	1.82929e-08	6.32056e-09	AKT1/F2/PTGS2/IL1B/MTOR/IFNG/PPARG/TNF	8
BP	GO:1904892	regulation of receptor signaling pathway via STAT	8/37	146/18670	3.67475e-10	1.82929e-08	6.32056e-09	F2/IFNG/IL2/IL10/IL6/RET/IL4/TNF	8
BP	GO:0046427	positive regulation of receptor signaling pathway via JAK-STAT	7/37	89/18670	4.03288e-10	1.94672e-08	6.7263e-09	F2/IFNG/IL2/IL10/IL6/IL4/TNF	7
BP	GO:0097191	extrinsic apoptotic signaling pathway	9/37	224/18670	4.07622e-10	1.94672e-08	6.7263e-09	AKT1/NOS3/IL1A/IL1B/ICAM1/IFNG/IL2/RET/TNF	9
BP	GO:0062012	regulation of small molecule metabolic process	11/37	429/18670	4.14528e-10	1.94672e-08	6.7263e-09	AKT1/NOS3/NOS1/PTGS2/NOS2/IL1B/MTOR/IFNG/PPARG/IL4/TNF	11
BP	GO:1904894	positive regulation of receptor signaling pathway via STAT	7/37	92/18670	5.10591e-10	2.35345e-08	8.13164e-09	F2/IFNG/IL2/IL10/IL6/IL4/TNF	7
BP	GO:0050729	positive regulation of inflammatory response	8/37	153/18670	5.34145e-10	2.41725e-08	8.35208e-09	PLA2G2A/PTGS2/TLR9/IL1B/TGM2/IL2/IL6/TNF	8
BP	GO:0043271	negative regulation of ion transport	8/37	157/18670	6.56153e-10	2.91637e-08	1.00766e-08	AKT1/NOS3/NOS1/PTGS2/TLR9/ICAM1/MTOR/MMP9	8
BP	GO:0007259	receptor signaling pathway via JAK-STAT	8/37	159/18670	7.25747e-10	3.11785e-08	1.07728e-08	F2/IFNG/IL2/IL10/IL6/RET/IL4/TNF	8
BP	GO:0007159	leukocyte cell-cell adhesion	10/37	337/18670	7.26537e-10	3.11785e-08	1.07728e-08	AKT1/CD40LG/IL1B/ICAM1/IFNG/IL2/IL10/IL6/IL4/TNF	10
BP	GO:0002449	lymphocyte mediated immunity	10/37	352/18670	1.10718e-09	4.67081e-08	1.61386e-08	CD40LG/CRP/IL1B/PRF1/ICAM1/IL2/IL10/IL6/IL4/TNF	10
BP	GO:0097696	receptor signaling pathway via STAT	8/37	169/18670	1.17852e-09	4.88891e-08	1.68922e-08	F2/IFNG/IL2/IL10/IL6/RET/IL4/TNF	8
BP	GO:0006959	humoral immune response	10/37	356/18670	1.23484e-09	5.03856e-08	1.74092e-08	F2/C5AR1/PLA2G2A/CRP/CXCL10/CXCL8/IL1B/IFNG/IL6/TNF	10
BP	GO:0033138	positive regulation of peptidyl-serine phosphorylation	7/37	105/18670	1.30246e-09	5.22873e-08	1.80663e-08	AKT1/NOS1/PTGS2/IFNG/IL6/RET/TNF	7
BP	GO:0048871	multicellular organismal homeostasis	11/37	486/18670	1.54149e-09	6.01373e-08	2.07787e-08	ALB/CALCA/NOS3/CFTR/PTGS2/TLR9/IL1A/IL1B/IL6/IL4/TNF	11
BP	GO:0003018	vascular process in circulatory system	8/37	175/18670	1.55407e-09	6.01373e-08	2.07787e-08	AKT1/EDNRA/NOS3/NOS1/CRP/PTGS2/ICAM1/IL6	8
BP	GO:0051091	positive regulation of DNA-binding transcription factor activity	9/37	261/18670	1.57048e-09	6.01373e-08	2.07787e-08	AKT1/CD40LG/TLR9/IL1B/ICAM1/IL10/IL6/PPARG/TNF	9
BP	GO:0048143	astrocyte activation	5/37	27/18670	1.80489e-09	6.80661e-08	2.35182e-08	C5AR1/IL1B/IFNG/IL6/TNF	5
BP	GO:1904019	epithelial cell apoptotic process	7/37	111/18670	1.92715e-09	7.1592e-08	2.47365e-08	CD40LG/ICAM1/MTOR/IL10/IL6/IL4/TNF	7
BP	GO:0002285	lymphocyte activation involved in immune response	8/37	181/18670	2.02929e-09	7.42781e-08	2.56646e-08	CD40LG/ICAM1/MTOR/IFNG/IL2/IL10/IL6/IL4	8
BP	GO:0045765	regulation of angiogenesis	10/37	383/18670	2.49684e-09	9.00672e-08	3.11201e-08	C5AR1/NOS3/PTGS2/CXCL10/CXCL8/IL1A/IL1B/IL10/IL6/PPARG	10
BP	GO:0010575	positive regulation of vascular endothelial growth factor production	5/37	29/18670	2.64743e-09	9.41352e-08	3.25256e-08	C5AR1/PTGS2/IL1A/IL1B/IL6	5
BP	GO:0001660	fever generation	4/37	10/18670	2.71735e-09	9.52602e-08	3.29143e-08	PTGS2/IL1A/IL1B/TNF	4
BP	GO:0050731	positive regulation of peptidyl-tyrosine phosphorylation	8/37	192/18670	3.23327e-09	1.11772e-07	3.86196e-08	NCF1/ICAM1/MTOR/IFNG/IL2/IL6/IL4/TNF	8
BP	GO:0042108	positive regulation of cytokine biosynthetic process	6/37	67/18670	3.61866e-09	1.23381e-07	4.26308e-08	TLR9/IL1A/IL1B/IFNG/IL6/TNF	6
BP	GO:0042063	gliogenesis	9/37	290/18670	3.95175e-09	1.31844e-07	4.55547e-08	AKT1/F2/C5AR1/IL1B/MTOR/IFNG/IL6/PPARG/TNF	9
BP	GO:0022407	regulation of cell-cell adhesion	10/37	402/18670	3.97279e-09	1.31844e-07	4.55547e-08	AKT1/CD40LG/IL1B/ICAM1/IFNG/IL2/IL10/IL6/IL4/TNF	10
BP	GO:0002703	regulation of leukocyte mediated immunity	8/37	205/18670	5.4142e-09	1.77315e-07	6.12659e-08	NOS2/IL1B/ICAM1/IL2/IL10/IL6/IL4/TNF	8
BP	GO:0038034	signal transduction in absence of ligand	6/37	72/18670	5.62508e-09	1.79498e-07	6.20201e-08	AKT1/IL1A/IL1B/IL2/RET/TNF	6
BP	GO:0097192	extrinsic apoptotic signaling pathway in absence of ligand	6/37	72/18670	5.62508e-09	1.79498e-07	6.20201e-08	AKT1/IL1A/IL1B/IL2/RET/TNF	6
BP	GO:0010574	regulation of vascular endothelial growth factor production	5/37	34/18670	6.15904e-09	1.94049e-07	6.70477e-08	C5AR1/PTGS2/IL1A/IL1B/IL6	5
BP	GO:1901342	regulation of vasculature development	10/37	422/18670	6.31963e-09	1.9662e-07	6.79361e-08	C5AR1/NOS3/PTGS2/CXCL10/CXCL8/IL1A/IL1B/IL10/IL6/PPARG	10
BP	GO:0010573	vascular endothelial growth factor production	5/37	36/18670	8.32067e-09	2.55681e-07	8.83429e-08	C5AR1/PTGS2/IL1A/IL1B/IL6	5
BP	GO:0002699	positive regulation of immune effector process	8/37	219/18670	9.08832e-09	2.75864e-07	9.53166e-08	TLR9/NOS2/IL1B/IFNG/IL2/IL6/IL4/TNF	8
BP	GO:0033135	regulation of peptidyl-serine phosphorylation	7/37	139/18670	9.30567e-09	2.79058e-07	9.64202e-08	AKT1/NOS1/PTGS2/IFNG/IL6/RET/TNF	7
BP	GO:0035296	regulation of tube diameter	7/37	143/18670	1.13354e-08	3.31927e-07	1.14688e-07	AKT1/EDNRA/NOS3/NOS1/CRP/PTGS2/ICAM1	7
BP	GO:0097746	regulation of blood vessel diameter	7/37	143/18670	1.13354e-08	3.31927e-07	1.14688e-07	AKT1/EDNRA/NOS3/NOS1/CRP/PTGS2/ICAM1	7
BP	GO:0048708	astrocyte differentiation	6/37	81/18670	1.15354e-08	3.33856e-07	1.15354e-07	F2/C5AR1/IL1B/IFNG/IL6/TNF	6
BP	GO:0035150	regulation of tube size	7/37	144/18670	1.18978e-08	3.40385e-07	1.1761e-07	AKT1/EDNRA/NOS3/NOS1/CRP/PTGS2/ICAM1	7
BP	GO:0042742	defense response to bacterium	9/37	330/18670	1.21554e-08	3.43713e-07	1.1876e-07	F2/C5AR1/PLA2G2A/CRP/TLR9/NOS2/IL10/IL6/TNF	9
BP	GO:0032637	interleukin-8 production	6/37	82/18670	1.24283e-08	3.43713e-07	1.1876e-07	CRP/TLR9/NOS2/IL1B/IL10/TNF	6
BP	GO:0032642	regulation of chemokine production	6/37	82/18670	1.24283e-08	3.43713e-07	1.1876e-07	TLR9/IL1B/IFNG/IL10/IL6/TNF	6
BP	GO:0032147	activation of protein kinase activity	9/37	333/18670	1.31461e-08	3.59567e-07	1.24238e-07	AKT1/CALCA/C5AR1/CD40LG/IL1B/MTOR/RET/IL4/TNF	9
BP	GO:2001234	negative regulation of apoptotic signaling pathway	8/37	230/18670	1.33298e-08	3.60628e-07	1.24604e-07	AKT1/NOS3/PTGS2/IL1A/IL1B/ICAM1/MMP9/TNF	8
BP	GO:0000302	response to reactive oxygen species	8/37	232/18670	1.42614e-08	3.80928e-07	1.31619e-07	AKT1/MB/NOS3/NCF1/MMP9/IL10/IL6/TNF	8
BP	GO:0046889	positive regulation of lipid biosynthetic process	6/37	84/18670	1.43862e-08	3.80928e-07	1.31619e-07	AKT1/PTGS2/IL1B/MTOR/IFNG/TNF	6
BP	GO:0042110	T cell activation	10/37	464/18670	1.5581e-08	4.08222e-07	1.41049e-07	AKT1/CD40LG/IL1B/ICAM1/MTOR/IFNG/IL2/IL10/IL6/IL4	10
BP	GO:0050663	cytokine secretion	8/37	240/18670	1.85736e-08	4.8156e-07	1.66389e-07	CRP/TLR9/IL1A/NOS2/IL1B/IFNG/IL10/TNF	8
BP	GO:1904035	regulation of epithelial cell apoptotic process	6/37	88/18670	1.90709e-08	4.89356e-07	1.69082e-07	CD40LG/ICAM1/MTOR/IL6/IL4/TNF	6
BP	GO:2001236	regulation of extrinsic apoptotic signaling pathway	7/37	155/18670	1.98213e-08	5.0342e-07	1.73942e-07	AKT1/NOS3/IL1A/IL1B/ICAM1/RET/TNF	7
BP	GO:0062197	cellular response to chemical stress	9/37	350/18670	2.02133e-08	5.0418e-07	1.74204e-07	AKT1/NOS3/PTGS2/NCF1/MMP9/IL10/IL6/PPARG/TNF	9
BP	GO:0032602	chemokine production	6/37	89/18670	2.04204e-08	5.0418e-07	1.74204e-07	TLR9/IL1B/IFNG/IL10/IL6/TNF	6
BP	GO:0009266	response to temperature stimulus	8/37	243/18670	2.04589e-08	5.0418e-07	1.74204e-07	AKT1/NOS3/NOS1/PTGS2/CXCL10/IL1A/MTOR/PPARG	8
BP	GO:0042033	chemokine biosynthetic process	4/37	16/18670	2.33512e-08	5.64283e-07	1.94971e-07	IL1B/IFNG/IL6/TNF	4
BP	GO:0050755	chemokine metabolic process	4/37	16/18670	2.33512e-08	5.64283e-07	1.94971e-07	IL1B/IFNG/IL6/TNF	4
BP	GO:0014002	astrocyte development	5/37	44/18670	2.36969e-08	5.6713e-07	1.95955e-07	C5AR1/IL1B/IFNG/IL6/TNF	5
BP	GO:0018108	peptidyl-tyrosine phosphorylation	9/37	363/18670	2.76751e-08	6.56032e-07	2.26672e-07	NCF1/ICAM1/MTOR/IFNG/IL2/IL6/RET/IL4/TNF	9
BP	GO:0018212	peptidyl-tyrosine modification	9/37	366/18670	2.97054e-08	6.81042e-07	2.35314e-07	NCF1/ICAM1/MTOR/IFNG/IL2/IL6/RET/IL4/TNF	9
BP	GO:0002673	regulation of acute inflammatory response	5/37	46/18670	2.98247e-08	6.81042e-07	2.35314e-07	PTGS2/IL1B/IL6/PPARG/TNF	5
BP	GO:0045981	positive regulation of nucleotide metabolic process	5/37	46/18670	2.98247e-08	6.81042e-07	2.35314e-07	NOS3/NOS1/NOS2/IFNG/IL4	5
BP	GO:1900544	positive regulation of purine nucleotide metabolic process	5/37	46/18670	2.98247e-08	6.81042e-07	2.35314e-07	NOS3/NOS1/NOS2/IFNG/IL4	5
BP	GO:0031649	heat generation	4/37	17/18670	3.0493e-08	6.87679e-07	2.37607e-07	PTGS2/IL1A/IL1B/TNF	4
BP	GO:0050730	regulation of peptidyl-tyrosine phosphorylation	8/37	256/18670	3.06679e-08	6.87679e-07	2.37607e-07	NCF1/ICAM1/MTOR/IFNG/IL2/IL6/IL4/TNF	8
BP	GO:2001239	regulation of extrinsic apoptotic signaling pathway in absence of ligand	5/37	47/18670	3.33275e-08	7.40645e-07	2.55908e-07	AKT1/IL1A/IL1B/RET/TNF	5
BP	GO:0034614	cellular response to reactive oxygen species	7/37	168/18670	3.45682e-08	7.61419e-07	2.63086e-07	AKT1/NOS3/NCF1/MMP9/IL10/IL6/TNF	7
BP	GO:0051023	regulation of immunoglobulin secretion	4/37	18/18670	3.91499e-08	8.54772e-07	2.95341e-07	CD40LG/IL2/IL6/TNF	4
BP	GO:0002696	positive regulation of leukocyte activation	9/37	380/18670	4.1005e-08	8.87491e-07	3.06646e-07	AKT1/CD40LG/TLR9/IL1B/IFNG/IL2/IL10/IL6/IL4	9
BP	GO:0050714	positive regulation of protein secretion	8/37	268/18670	4.37272e-08	9.38249e-07	3.24184e-07	CFTR/IL1A/IL1B/IFNG/IL2/IL10/IL6/TNF	8
BP	GO:0009408	response to heat	7/37	176/18670	4.76126e-08	1.01289e-06	3.49973e-07	AKT1/NOS3/NOS1/PTGS2/CXCL10/IL1A/MTOR	7
BP	GO:0010888	negative regulation of lipid storage	4/37	19/18670	4.95197e-08	1.03575e-06	3.57874e-07	CRP/IL6/PPARG/TNF	4
BP	GO:0060252	positive regulation of glial cell proliferation	4/37	19/18670	4.95197e-08	1.03575e-06	3.57874e-07	IL1B/MTOR/IL6/TNF	4
BP	GO:2001237	negative regulation of extrinsic apoptotic signaling pathway	6/37	104/18670	5.21924e-08	1.08256e-06	3.74046e-07	AKT1/NOS3/IL1A/IL1B/ICAM1/TNF	6
BP	GO:0010959	regulation of metal ion transport	9/37	394/18670	5.58998e-08	1.13118e-06	3.90844e-07	AKT1/F2/NOS3/NOS1/PTGS2/TLR9/CXCL10/ICAM1/IFNG	9
BP	GO:0050867	positive regulation of cell activation	9/37	394/18670	5.58998e-08	1.13118e-06	3.90844e-07	AKT1/CD40LG/TLR9/IL1B/IFNG/IL2/IL10/IL6/IL4	9
BP	GO:0070482	response to oxygen levels	9/37	394/18670	5.58998e-08	1.13118e-06	3.90844e-07	AKT1/EDNRA/MB/NOS1/PTGS2/NOS2/ICAM1/MTOR/PPARG	9
BP	GO:0002440	production of molecular mediator of immune response	8/37	286/18670	7.22131e-08	1.43829e-06	4.96957e-07	CD40LG/TLR9/IL1B/IL2/IL10/IL6/IL4/TNF	8
BP	GO:2001233	regulation of apoptotic signaling pathway	9/37	406/18670	7.22321e-08	1.43829e-06	4.96957e-07	AKT1/NOS3/PTGS2/IL1A/IL1B/ICAM1/MMP9/RET/TNF	9
BP	GO:0002793	positive regulation of peptide secretion	8/37	288/18670	7.61934e-08	1.50512e-06	5.2005e-07	CFTR/IL1A/IL1B/IFNG/IL2/IL10/IL6/TNF	8
BP	GO:0019216	regulation of lipid metabolic process	9/37	410/18670	7.8533e-08	1.53912e-06	5.31798e-07	AKT1/F2/PTGS2/IL1B/MTOR/IFNG/PPARG/HNF4A/TNF	9
BP	GO:0010632	regulation of epithelial cell migration	8/37	291/18670	8.25179e-08	1.60459e-06	5.54417e-07	AKT1/NOS3/PTGS2/MTOR/MMP9/IFNG/PPARG/IL4	8
BP	GO:0010876	lipid localization	9/37	415/18670	8.70804e-08	1.68018e-06	5.80536e-07	AKT1/PLA2G2A/CFTR/CRP/NOS2/IL1B/IL6/PPARG/TNF	9
BP	GO:0002377	immunoglobulin production	7/37	193/18670	8.95927e-08	1.71535e-06	5.9269e-07	CD40LG/TLR9/IL2/IL10/IL6/IL4/TNF	7
BP	GO:0048305	immunoglobulin secretion	4/37	22/18670	9.30604e-08	1.76815e-06	6.10931e-07	CD40LG/IL2/IL6/TNF	4
BP	GO:0032722	positive regulation of chemokine production	5/37	58/18670	9.80008e-08	1.83401e-06	6.33689e-07	TLR9/IL1B/IFNG/IL6/TNF	5
BP	GO:0061900	glial cell activation	5/37	58/18670	9.80008e-08	1.83401e-06	6.33689e-07	C5AR1/IL1B/IFNG/IL6/TNF	5
BP	GO:0002685	regulation of leukocyte migration	7/37	196/18670	9.95546e-08	1.84919e-06	6.38932e-07	AKT1/C5AR1/CXCL10/CXCL8/ICAM1/IL6/TNF	7
BP	GO:0021782	glial cell development	6/37	116/18670	1.00328e-07	1.84975e-06	6.39127e-07	AKT1/C5AR1/IL1B/IFNG/IL6/TNF	6
BP	GO:0018105	peptidyl-serine phosphorylation	8/37	299/18670	1.0164e-07	1.86017e-06	6.42727e-07	AKT1/NOS1/PTGS2/MTOR/IFNG/IL6/RET/TNF	8
BP	GO:0033619	membrane protein proteolysis	5/37	59/18670	1.06922e-07	1.94254e-06	6.71189e-07	IL1B/IFNG/IL10/RET/TNF	5
BP	GO:0030810	positive regulation of nucleotide biosynthetic process	4/37	23/18670	1.12493e-07	1.99996e-06	6.91027e-07	NOS3/NOS1/NOS2/IL4	4
BP	GO:0051043	regulation of membrane protein ectodomain proteolysis	4/37	23/18670	1.12493e-07	1.99996e-06	6.91027e-07	IL1B/IFNG/IL10/TNF	4
BP	GO:1900373	positive regulation of purine nucleotide biosynthetic process	4/37	23/18670	1.12493e-07	1.99996e-06	6.91027e-07	NOS3/NOS1/NOS2/IL4	4
BP	GO:0050870	positive regulation of T cell activation	7/37	202/18670	1.22308e-07	2.14764e-06	7.42052e-07	AKT1/CD40LG/IL1B/IFNG/IL2/IL6/IL4	7
BP	GO:0051090	regulation of DNA-binding transcription factor activity	9/37	432/18670	1.22525e-07	2.14764e-06	7.42052e-07	AKT1/CD40LG/TLR9/IL1B/ICAM1/IL10/IL6/PPARG/TNF	9
BP	GO:1905953	negative regulation of lipid localization	5/37	61/18670	1.26694e-07	2.20518e-06	7.61934e-07	AKT1/CRP/IL6/PPARG/TNF	5
BP	GO:0045766	positive regulation of angiogenesis	7/37	204/18670	1.30807e-07	2.26097e-06	7.8121e-07	C5AR1/NOS3/PTGS2/CXCL8/IL1A/IL1B/IL10	7
BP	GO:0051222	positive regulation of protein transport	9/37	440/18670	1.43168e-07	2.45756e-06	8.49136e-07	CFTR/PTGS2/IL1A/IL1B/IFNG/IL2/IL10/IL6/TNF	9
BP	GO:0050863	regulation of T cell activation	8/37	314/18670	1.47919e-07	2.51101e-06	8.67605e-07	AKT1/CD40LG/IL1B/IFNG/IL2/IL10/IL6/IL4	8
BP	GO:0014013	regulation of gliogenesis	6/37	124/18670	1.49274e-07	2.51101e-06	8.67605e-07	F2/IL1B/MTOR/IL6/PPARG/TNF	6
BP	GO:0050670	regulation of lymphocyte proliferation	7/37	208/18670	1.49309e-07	2.51101e-06	8.67605e-07	CD40LG/TLR9/IL1B/IL2/IL10/IL6/IL4	7
BP	GO:0032944	regulation of mononuclear cell proliferation	7/37	209/18670	1.54264e-07	2.57694e-06	8.90385e-07	CD40LG/TLR9/IL1B/IL2/IL10/IL6/IL4	7
BP	GO:0050707	regulation of cytokine secretion	7/37	210/18670	1.59358e-07	2.64429e-06	9.13654e-07	CRP/TLR9/IL1A/IL1B/IFNG/IL10/TNF	7
BP	GO:0007204	positive regulation of cytosolic calcium ion concentration	8/37	319/18670	1.66916e-07	2.75136e-06	9.5065e-07	CALCA/F2/EDNRA/C5AR1/NOS1/CXCL10/TGM2/IL2	8
BP	GO:0032768	regulation of monooxygenase activity	5/37	65/18670	1.749e-07	2.84527e-06	9.83098e-07	AKT1/NOS3/IL1B/IFNG/TNF	5
BP	GO:0072577	endothelial cell apoptotic process	5/37	65/18670	1.749e-07	2.84527e-06	9.83098e-07	CD40LG/ICAM1/IL10/IL4/TNF	5
BP	GO:0006979	response to oxidative stress	9/37	451/18670	1.76476e-07	2.85227e-06	9.85517e-07	AKT1/MB/NOS3/PTGS2/NCF1/MMP9/IL10/IL6/TNF	9
BP	GO:0018209	peptidyl-serine modification	8/37	322/18670	1.79293e-07	2.85792e-06	9.87469e-07	AKT1/NOS1/PTGS2/MTOR/IFNG/IL6/RET/TNF	8
BP	GO:0002687	positive regulation of leukocyte migration	6/37	128/18670	1.80271e-07	2.85792e-06	9.87469e-07	C5AR1/CXCL10/CXCL8/ICAM1/IL6/TNF	6
BP	GO:0034763	negative regulation of transmembrane transport	6/37	128/18670	1.80271e-07	2.85792e-06	9.87469e-07	AKT1/TLR9/IL1B/MTOR/MMP9/TNF	6
BP	GO:0051926	negative regulation of calcium ion transport	5/37	66/18670	1.88966e-07	2.96048e-06	1.0229e-06	NOS3/NOS1/PTGS2/TLR9/ICAM1	5
BP	GO:0032800	receptor biosynthetic process	4/37	26/18670	1.89118e-07	2.96048e-06	1.0229e-06	IFNG/IL10/PPARG/TNF	4
BP	GO:1904951	positive regulation of establishment of protein localization	9/37	456/18670	1.93725e-07	3.01364e-06	1.04127e-06	CFTR/PTGS2/IL1A/IL1B/IFNG/IL2/IL10/IL6/TNF	9
BP	GO:0050671	positive regulation of lymphocyte proliferation	6/37	130/18670	1.97647e-07	3.05555e-06	1.05576e-06	CD40LG/TLR9/IL1B/IL2/IL6/IL4	6
BP	GO:0032946	positive regulation of mononuclear cell proliferation	6/37	131/18670	2.06839e-07	3.17791e-06	1.09803e-06	CD40LG/TLR9/IL1B/IL2/IL6/IL4	6
BP	GO:0001667	ameboidal-type cell migration	9/37	462/18670	2.16349e-07	3.28395e-06	1.13467e-06	AKT1/NOS3/PTGS2/MTOR/MMP9/IFNG/RET/PPARG/IL4	9
BP	GO:0045598	regulation of fat cell differentiation	6/37	132/18670	2.16379e-07	3.28395e-06	1.13467e-06	AKT1/PTGS2/MTOR/IL6/PPARG/TNF	6
BP	GO:0019915	lipid storage	5/37	68/18670	2.19782e-07	3.31538e-06	1.14553e-06	CRP/IL1B/IL6/PPARG/TNF	5
BP	GO:0070663	regulation of leukocyte proliferation	7/37	222/18670	2.32452e-07	3.48538e-06	1.20427e-06	CD40LG/TLR9/IL1B/IL2/IL10/IL6/IL4	7
BP	GO:0051251	positive regulation of lymphocyte activation	8/37	334/18670	2.37024e-07	3.51162e-06	1.21334e-06	AKT1/CD40LG/TLR9/IL1B/IFNG/IL2/IL6/IL4	8
BP	GO:0071902	positive regulation of protein serine/threonine kinase activity	8/37	334/18670	2.37024e-07	3.51162e-06	1.21334e-06	AKT1/C5AR1/CD40LG/TLR9/IL1B/IFNG/RET/TNF	8
BP	GO:0045444	fat cell differentiation	7/37	223/18670	2.39646e-07	3.52946e-06	1.2195e-06	AKT1/MB/PTGS2/MTOR/IL6/PPARG/TNF	7
BP	GO:0030595	leukocyte chemotaxis	7/37	224/18670	2.47027e-07	3.61676e-06	1.24966e-06	CALCA/C5AR1/CXCL10/CXCL8/IL1B/IL10/IL6	7
BP	GO:0002705	positive regulation of leukocyte mediated immunity	6/37	136/18670	2.58237e-07	3.75878e-06	1.29873e-06	NOS2/IL1B/IL2/IL6/IL4/TNF	6
BP	GO:0042531	positive regulation of tyrosine phosphorylation of STAT protein	5/37	71/18670	2.73336e-07	3.95543e-06	1.36668e-06	IFNG/IL2/IL6/IL4/TNF	5
BP	GO:0070665	positive regulation of leukocyte proliferation	6/37	139/18670	2.93816e-07	4.22643e-06	1.46032e-06	CD40LG/TLR9/IL1B/IL2/IL6/IL4	6
BP	GO:1904018	positive regulation of vasculature development	7/37	230/18670	2.9546e-07	4.22643e-06	1.46032e-06	C5AR1/NOS3/PTGS2/CXCL8/IL1A/IL1B/IL10	7
BP	GO:0006801	superoxide metabolic process	5/37	73/18670	3.14432e-07	4.45022e-06	1.53764e-06	NOS3/CRP/NCF1/NOS2/TNF	5
BP	GO:0034765	regulation of ion transmembrane transport	9/37	483/18670	3.1468e-07	4.45022e-06	1.53764e-06	AKT1/F2/NOS1/CFTR/TLR9/CXCL10/MTOR/MMP9/IFNG	9
BP	GO:0051249	regulation of lymphocyte activation	9/37	485/18670	3.25809e-07	4.58157e-06	1.58303e-06	AKT1/CD40LG/TLR9/IL1B/IFNG/IL2/IL10/IL6/IL4	9
BP	GO:0014015	positive regulation of gliogenesis	5/37	74/18670	3.36735e-07	4.68231e-06	1.61783e-06	IL1B/MTOR/IL6/PPARG/TNF	5
BP	GO:0032677	regulation of interleukin-8 production	5/37	74/18670	3.36735e-07	4.68231e-06	1.61783e-06	CRP/TLR9/IL1B/IL10/TNF	5
BP	GO:0010631	epithelial cell migration	8/37	352/18670	3.53294e-07	4.88527e-06	1.68796e-06	AKT1/NOS3/PTGS2/MTOR/MMP9/IFNG/PPARG/IL4	8
BP	GO:0030098	lymphocyte differentiation	8/37	353/18670	3.60982e-07	4.964e-06	1.71516e-06	CD40LG/TLR9/MTOR/IFNG/IL2/IL10/IL6/IL4	8
BP	GO:0090132	epithelium migration	8/37	355/18670	3.76789e-07	5.12907e-06	1.7722e-06	AKT1/NOS3/PTGS2/MTOR/MMP9/IFNG/PPARG/IL4	8
BP	GO:0002822	regulation of adaptive immune response based on somatic recombination of immune receptors built from immunoglobulin superfamily domains	6/37	145/18670	3.77107e-07	5.12907e-06	1.7722e-06	IL1B/IL2/IL10/IL6/IL4/TNF	6
BP	GO:0051480	regulation of cytosolic calcium ion concentration	8/37	357/18670	3.93187e-07	5.28884e-06	1.8274e-06	CALCA/F2/EDNRA/C5AR1/NOS1/CXCL10/TGM2/IL2	8
BP	GO:0002675	positive regulation of acute inflammatory response	4/37	31/18670	3.95228e-07	5.28884e-06	1.8274e-06	PTGS2/IL1B/IL6/TNF	4
BP	GO:0032770	positive regulation of monooxygenase activity	4/37	31/18670	3.95228e-07	5.28884e-06	1.8274e-06	AKT1/IL1B/IFNG/TNF	4
BP	GO:0001666	response to hypoxia	8/37	359/18670	4.10193e-07	5.45973e-06	1.88645e-06	AKT1/EDNRA/MB/NOS1/PTGS2/NOS2/ICAM1/MTOR	8
BP	GO:0031667	response to nutrient levels	9/37	499/18670	4.13765e-07	5.47798e-06	1.89275e-06	AKT1/ALB/PTGS2/CXCL10/IL1B/ICAM1/MTOR/PPARG/TYR	9
BP	GO:0090130	tissue migration	8/37	361/18670	4.27826e-07	5.63417e-06	1.94672e-06	AKT1/NOS3/PTGS2/MTOR/MMP9/IFNG/PPARG/IL4	8
BP	GO:0002706	regulation of lymphocyte mediated immunity	6/37	149/18670	4.42722e-07	5.79965e-06	2.0039e-06	IL1B/IL2/IL10/IL6/IL4/TNF	6
BP	GO:0036293	response to decreased oxygen levels	8/37	370/18670	5.15457e-07	6.71714e-06	2.32091e-06	AKT1/EDNRA/MB/NOS1/PTGS2/NOS2/ICAM1/MTOR	8
BP	GO:0030072	peptide hormone secretion	7/37	250/18670	5.18703e-07	6.72423e-06	2.32336e-06	CFTR/NOS2/IL1B/IFNG/IL6/HNF4A/TNF	7
BP	GO:0051924	regulation of calcium ion transport	7/37	254/18670	5.77165e-07	7.40321e-06	2.55796e-06	F2/NOS3/NOS1/PTGS2/TLR9/CXCL10/ICAM1	7
BP	GO:0042129	regulation of T cell proliferation	6/37	156/18670	5.80002e-07	7.40321e-06	2.55796e-06	CD40LG/IL1B/IL2/IL10/IL6/IL4	6
BP	GO:1905952	regulation of lipid localization	6/37	156/18670	5.80002e-07	7.40321e-06	2.55796e-06	AKT1/CRP/IL1B/IL6/PPARG/TNF	6
BP	GO:0042509	regulation of tyrosine phosphorylation of STAT protein	5/37	83/18670	5.99168e-07	7.60882e-06	2.629e-06	IFNG/IL2/IL6/IL4/TNF	5
BP	GO:0097756	negative regulation of blood vessel diameter	5/37	84/18670	6.3618e-07	8.03782e-06	2.77723e-06	AKT1/EDNRA/CRP/PTGS2/ICAM1	5
BP	GO:0060251	regulation of glial cell proliferation	4/37	35/18670	6.53977e-07	8.22095e-06	2.84051e-06	IL1B/MTOR/IL6/TNF	4
BP	GO:0002819	regulation of adaptive immune response	6/37	160/18670	6.72961e-07	8.41708e-06	2.90827e-06	IL1B/IL2/IL10/IL6/IL4/TNF	6
BP	GO:0031349	positive regulation of defense response	8/37	384/18670	6.82253e-07	8.49063e-06	2.93369e-06	PLA2G2A/PTGS2/TLR9/IL1B/TGM2/IL2/IL6/TNF	8
BP	GO:0032635	interleukin-6 production	6/37	161/18670	6.98013e-07	8.64355e-06	2.98652e-06	TLR9/NOS2/IL1B/IL10/IL6/TNF	6
BP	GO:0007260	tyrosine phosphorylation of STAT protein	5/37	86/18670	7.15616e-07	8.81766e-06	3.04668e-06	IFNG/IL2/IL6/IL4/TNF	5
BP	GO:0097242	amyloid-beta clearance	4/37	36/18670	7.34684e-07	8.92014e-06	3.08209e-06	C5AR1/IFNG/IL4/TNF	4
BP	GO:1901099	negative regulation of signal transduction in absence of ligand	4/37	36/18670	7.34684e-07	8.92014e-06	3.08209e-06	AKT1/IL1A/IL1B/TNF	4
BP	GO:2001240	negative regulation of extrinsic apoptotic signaling pathway in absence of ligand	4/37	36/18670	7.34684e-07	8.92014e-06	3.08209e-06	AKT1/IL1A/IL1B/TNF	4
BP	GO:0031284	positive regulation of guanylate cyclase activity	3/37	10/18670	8.51599e-07	1.02398e-05	3.53805e-06	NOS3/NOS1/NOS2	3
BP	GO:0045348	positive regulation of MHC class II biosynthetic process	3/37	10/18670	8.51599e-07	1.02398e-05	3.53805e-06	IFNG/IL10/IL4	3
BP	GO:0001906	cell killing	6/37	168/18670	8.95666e-07	1.06935e-05	3.69481e-06	F2/NOS2/PRF1/ICAM1/IFNG/IL4	6
BP	GO:0071674	mononuclear cell migration	5/37	90/18670	8.97924e-07	1.06935e-05	3.69481e-06	CALCA/C5AR1/CXCL10/IL6/TNF	5
BP	GO:0046651	lymphocyte proliferation	7/37	272/18670	9.13672e-07	1.08292e-05	3.74171e-06	CD40LG/TLR9/IL1B/IL2/IL10/IL6/IL4	7
BP	GO:0032943	mononuclear cell proliferation	7/37	274/18670	9.59578e-07	1.13194e-05	3.91108e-06	CD40LG/TLR9/IL1B/IL2/IL10/IL6/IL4	7
BP	GO:1903532	positive regulation of secretion by cell	8/37	403/18670	9.81092e-07	1.14897e-05	3.96992e-06	CFTR/IL1A/IL1B/IFNG/IL2/IL10/IL6/TNF	8
BP	GO:0043270	positive regulation of ion transport	7/37	275/18670	9.83248e-07	1.14897e-05	3.96992e-06	AKT1/F2/NOS1/CFTR/CXCL10/IL1B/IFNG	7
BP	GO:0010634	positive regulation of epithelial cell migration	6/37	171/18670	9.93348e-07	1.15535e-05	3.99196e-06	AKT1/NOS3/PTGS2/MTOR/MMP9/IFNG	6
BP	GO:1900371	regulation of purine nucleotide biosynthetic process	4/37	40/18670	1.13342e-06	1.31213e-05	4.53367e-06	NOS3/NOS1/NOS2/IL4	4
BP	GO:0031652	positive regulation of heat generation	3/37	11/18670	1.16935e-06	1.31788e-05	4.55355e-06	PTGS2/IL1B/TNF	3
BP	GO:0046886	positive regulation of hormone biosynthetic process	3/37	11/18670	1.16935e-06	1.31788e-05	4.55355e-06	IL1B/IFNG/TNF	3
BP	GO:0002702	positive regulation of production of molecular mediator of immune response	5/37	95/18670	1.17534e-06	1.31788e-05	4.55355e-06	TLR9/IL1B/IL2/IL6/IL4	5
BP	GO:0042100	B cell proliferation	5/37	95/18670	1.17534e-06	1.31788e-05	4.55355e-06	CD40LG/TLR9/IL2/IL10/IL4	5
BP	GO:0042102	positive regulation of T cell proliferation	5/37	95/18670	1.17534e-06	1.31788e-05	4.55355e-06	CD40LG/IL1B/IL2/IL6/IL4	5
BP	GO:0042116	macrophage activation	5/37	95/18670	1.17534e-06	1.31788e-05	4.55355e-06	C5AR1/IFNG/IL10/IL6/TNF	5
BP	GO:0050796	regulation of insulin secretion	6/37	176/18670	1.17545e-06	1.31788e-05	4.55355e-06	CFTR/NOS2/IL1B/IFNG/HNF4A/TNF	6
BP	GO:0019217	regulation of fatty acid metabolic process	5/37	96/18670	1.23815e-06	1.38195e-05	4.77493e-06	AKT1/PTGS2/IL1B/MTOR/PPARG	5
BP	GO:0030808	regulation of nucleotide biosynthetic process	4/37	41/18670	1.25417e-06	1.39359e-05	4.81513e-06	NOS3/NOS1/NOS2/IL4	4
BP	GO:0048771	tissue remodeling	6/37	179/18670	1.29723e-06	1.43503e-05	4.95832e-06	CALCA/NOS3/IL1A/TGM2/IL2/IL6	6
BP	GO:0015908	fatty acid transport	5/37	97/18670	1.30357e-06	1.43566e-05	4.96051e-06	AKT1/PLA2G2A/NOS2/IL1B/PPARG	5
BP	GO:0031341	regulation of cell killing	5/37	98/18670	1.3717e-06	1.50403e-05	5.19673e-06	NOS2/PRF1/ICAM1/IFNG/IL4	5
BP	GO:0002639	positive regulation of immunoglobulin production	4/37	42/18670	1.38423e-06	1.50452e-05	5.19842e-06	TLR9/IL2/IL6/IL4	4
BP	GO:0006509	membrane protein ectodomain proteolysis	4/37	42/18670	1.38423e-06	1.50452e-05	5.19842e-06	IL1B/IFNG/IL10/TNF	4
BP	GO:0008217	regulation of blood pressure	6/37	182/18670	1.42916e-06	1.5466e-05	5.3438e-06	EDNRA/NOS3/NOS1/PTGS2/NOS2/PPARG	6
BP	GO:0002824	positive regulation of adaptive immune response based on somatic recombination of immune receptors built from immunoglobulin superfamily domains	5/37	100/18670	1.51635e-06	1.63385e-05	5.64528e-06	IL1B/IL2/IL6/IL4/TNF	5
BP	GO:0042098	T cell proliferation	6/37	184/18670	1.52305e-06	1.634e-05	5.64579e-06	CD40LG/IL1B/IL2/IL10/IL6/IL4	6
BP	GO:0051047	positive regulation of secretion	8/37	428/18670	1.53961e-06	1.64211e-05	5.67383e-06	CFTR/IL1A/IL1B/IFNG/IL2/IL10/IL6/TNF	8
BP	GO:0006527	arginine catabolic process	3/37	12/18670	1.557e-06	1.64211e-05	5.67383e-06	NOS3/NOS1/NOS2	3
BP	GO:0031282	regulation of guanylate cyclase activity	3/37	12/18670	1.557e-06	1.64211e-05	5.67383e-06	NOS3/NOS1/NOS2	3
BP	GO:0042368	vitamin D biosynthetic process	3/37	12/18670	1.557e-06	1.64211e-05	5.67383e-06	IL1B/IFNG/TNF	3
BP	GO:0046328	regulation of JNK cascade	6/37	185/18670	1.57186e-06	1.65078e-05	5.70378e-06	AKT1/CD40LG/TLR9/NCF1/IL1B/TNF	6
BP	GO:0032649	regulation of interferon-gamma production	5/37	101/18670	1.59305e-06	1.65903e-05	5.7323e-06	TLR9/IL1B/IL2/IL10/TNF	5
BP	GO:0050830	defense response to Gram-positive bacterium	5/37	101/18670	1.59305e-06	1.65903e-05	5.7323e-06	C5AR1/PLA2G2A/CRP/IL6/TNF	5
BP	GO:0001818	negative regulation of cytokine production	7/37	296/18670	1.60636e-06	1.66593e-05	5.75611e-06	F2/TLR9/IFNG/IL10/IL6/IL4/TNF	7
BP	GO:0002367	cytokine production involved in immune response	5/37	102/18670	1.67277e-06	1.72072e-05	5.94545e-06	IL1B/IL10/IL6/IL4/TNF	5
BP	GO:0035690	cellular response to drug	8/37	433/18670	1.67903e-06	1.72072e-05	5.94545e-06	CFTR/PTGS2/NOS2/IL1B/ICAM1/IL10/IL6/TNF	8
BP	GO:0070661	leukocyte proliferation	7/37	298/18670	1.67993e-06	1.72072e-05	5.94545e-06	CD40LG/TLR9/IL1B/IL2/IL10/IL6/IL4	7
BP	GO:0034599	cellular response to oxidative stress	7/37	302/18670	1.83559e-06	1.87245e-05	6.46971e-06	AKT1/NOS3/NCF1/MMP9/IL10/IL6/TNF	7
BP	GO:0019932	second-messenger-mediated signaling	8/37	439/18670	1.86042e-06	1.89003e-05	6.53045e-06	CALCA/NOS3/NOS1/CXCL10/CXCL8/NOS2/MTOR/TNF	8
BP	GO:0060326	cell chemotaxis	7/37	304/18670	1.91784e-06	1.93796e-05	6.69603e-06	CALCA/C5AR1/CXCL10/CXCL8/IL1B/IL10/IL6	7
BP	GO:0002708	positive regulation of lymphocyte mediated immunity	5/37	105/18670	1.93095e-06	1.93796e-05	6.69603e-06	IL1B/IL2/IL6/IL4/TNF	5
BP	GO:0002821	positive regulation of adaptive immune response	5/37	105/18670	1.93095e-06	1.93796e-05	6.69603e-06	IL1B/IL2/IL6/IL4/TNF	5
BP	GO:0007565	female pregnancy	6/37	192/18670	1.95054e-06	1.94976e-05	6.73681e-06	AKT1/CALCA/PTGS2/IL1B/MTOR/MMP9	6
BP	GO:0010883	regulation of lipid storage	4/37	46/18670	2.00671e-06	1.98301e-05	6.85171e-06	CRP/IL6/PPARG/TNF	4
BP	GO:0030656	regulation of vitamin metabolic process	3/37	13/18670	2.02134e-06	1.98301e-05	6.85171e-06	IL1B/IFNG/TNF	3
BP	GO:0031650	regulation of heat generation	3/37	13/18670	2.02134e-06	1.98301e-05	6.85171e-06	PTGS2/IL1B/TNF	3
BP	GO:0002286	T cell activation involved in immune response	5/37	106/18670	2.02364e-06	1.98301e-05	6.85171e-06	ICAM1/MTOR/IFNG/IL2/IL6	5
BP	GO:0002456	T cell mediated immunity	5/37	106/18670	2.02364e-06	1.98301e-05	6.85171e-06	IL1B/PRF1/ICAM1/IL6/IL4	5
BP	GO:0046879	hormone secretion	7/37	308/18670	2.09163e-06	2.0416e-05	7.05413e-06	CFTR/NOS2/IL1B/IFNG/IL6/HNF4A/TNF	7
BP	GO:0051341	regulation of oxidoreductase activity	5/37	107/18670	2.11981e-06	2.06102e-05	7.12123e-06	AKT1/NOS3/IL1B/IFNG/TNF	5
BP	GO:0002204	somatic recombination of immunoglobulin genes involved in immune response	4/37	47/18670	2.19028e-06	2.10487e-05	7.27276e-06	CD40LG/IL2/IL10/IL4	4
BP	GO:0002208	somatic diversification of immunoglobulins involved in immune response	4/37	47/18670	2.19028e-06	2.10487e-05	7.27276e-06	CD40LG/IL2/IL10/IL4	4
BP	GO:0045190	isotype switching	4/37	47/18670	2.19028e-06	2.10487e-05	7.27276e-06	CD40LG/IL2/IL10/IL4	4
BP	GO:0046890	regulation of lipid biosynthetic process	6/37	198/18670	2.33165e-06	2.2321e-05	7.71237e-06	AKT1/PTGS2/IL1B/MTOR/IFNG/TNF	6
BP	GO:0001774	microglial cell activation	4/37	48/18670	2.38602e-06	2.26672e-05	7.83198e-06	C5AR1/IFNG/IL6/TNF	4
BP	GO:0002269	leukocyte activation involved in inflammatory response	4/37	48/18670	2.38602e-06	2.26672e-05	7.83198e-06	C5AR1/IFNG/IL6/TNF	4
BP	GO:0009914	hormone transport	7/37	317/18670	2.53137e-06	2.39566e-05	8.27748e-06	CFTR/NOS2/IL1B/IFNG/IL6/HNF4A/TNF	7
BP	GO:0006874	cellular calcium ion homeostasis	8/37	458/18670	2.54932e-06	2.4035e-05	8.30459e-06	CALCA/F2/EDNRA/C5AR1/NOS1/CXCL10/TGM2/IL2	8
BP	GO:0045346	regulation of MHC class II biosynthetic process	3/37	14/18670	2.5691e-06	2.40395e-05	8.30613e-06	IFNG/IL10/IL4	3
BP	GO:0051712	positive regulation of killing of cells of other organism	3/37	14/18670	2.5691e-06	2.40395e-05	8.30613e-06	NOS2/PRF1/IFNG	3
BP	GO:0002573	myeloid leukocyte differentiation	6/37	204/18670	2.7715e-06	2.56762e-05	8.87165e-06	MTOR/MMP9/IFNG/PPARG/IL4/TNF	6
BP	GO:0034764	positive regulation of transmembrane transport	6/37	204/18670	2.7715e-06	2.56762e-05	8.87165e-06	AKT1/F2/NOS1/CFTR/CXCL10/IFNG	6
BP	GO:0032609	interferon-gamma production	5/37	113/18670	2.77497e-06	2.56762e-05	8.87165e-06	TLR9/IL1B/IL2/IL10/TNF	5
BP	GO:0014009	glial cell proliferation	4/37	50/18670	2.81606e-06	2.59599e-05	8.96967e-06	IL1B/MTOR/IL6/TNF	4
BP	GO:0009615	response to virus	7/37	323/18670	2.86553e-06	2.63184e-05	9.09356e-06	TLR9/CXCL10/IL1B/PRF1/IFNG/IL6/TNF	7
BP	GO:0030073	insulin secretion	6/37	207/18670	3.01554e-06	2.74186e-05	9.47368e-06	CFTR/NOS2/IL1B/IFNG/HNF4A/TNF	6
BP	GO:1900542	regulation of purine nucleotide metabolic process	5/37	115/18670	3.02552e-06	2.74186e-05	9.47368e-06	NOS3/NOS1/NOS2/IFNG/IL4	5
BP	GO:0002712	regulation of B cell mediated immunity	4/37	51/18670	3.05141e-06	2.74186e-05	9.47368e-06	IL2/IL10/IL4/TNF	4
BP	GO:0002889	regulation of immunoglobulin mediated immune response	4/37	51/18670	3.05141e-06	2.74186e-05	9.47368e-06	IL2/IL10/IL4/TNF	4
BP	GO:0007566	embryo implantation	4/37	51/18670	3.05141e-06	2.74186e-05	9.47368e-06	CALCA/PTGS2/IL1B/MMP9	4
BP	GO:0050999	regulation of nitric-oxide synthase activity	4/37	51/18670	3.05141e-06	2.74186e-05	9.47368e-06	AKT1/NOS3/IL1B/TNF	4
BP	GO:0090276	regulation of peptide hormone secretion	6/37	208/18670	3.10067e-06	2.77611e-05	9.59201e-06	CFTR/NOS2/IL1B/IFNG/HNF4A/TNF	6
BP	GO:0055074	calcium ion homeostasis	8/37	471/18670	3.13688e-06	2.79845e-05	9.66922e-06	CALCA/F2/EDNRA/C5AR1/NOS1/CXCL10/TGM2/IL2	8
BP	GO:0030730	sequestering of triglyceride	3/37	15/18670	3.207e-06	2.81064e-05	9.71132e-06	IL1B/PPARG/TNF	3
BP	GO:0032352	positive regulation of hormone metabolic process	3/37	15/18670	3.207e-06	2.81064e-05	9.71132e-06	IL1B/IFNG/TNF	3
BP	GO:0042362	fat-soluble vitamin biosynthetic process	3/37	15/18670	3.207e-06	2.81064e-05	9.71132e-06	IL1B/IFNG/TNF	3
BP	GO:0045342	MHC class II biosynthetic process	3/37	15/18670	3.207e-06	2.81064e-05	9.71132e-06	IFNG/IL10/IL4	3
BP	GO:0051044	positive regulation of membrane protein ectodomain proteolysis	3/37	15/18670	3.207e-06	2.81064e-05	9.71132e-06	IL1B/IFNG/TNF	3
BP	GO:0097529	myeloid leukocyte migration	6/37	210/18670	3.27683e-06	2.85286e-05	9.8572e-06	CALCA/C5AR1/CXCL10/CXCL8/IL1B/IL6	6
BP	GO:0050769	positive regulation of neurogenesis	8/37	474/18670	3.28773e-06	2.85286e-05	9.8572e-06	IL1B/MTOR/IFNG/IL2/IL6/RET/PPARG/TNF	8
BP	GO:0006140	regulation of nucleotide metabolic process	5/37	117/18670	3.29352e-06	2.85286e-05	9.8572e-06	NOS3/NOS1/NOS2/IFNG/IL4	5
BP	GO:0016447	somatic recombination of immunoglobulin gene segments	4/37	52/18670	3.30102e-06	2.85286e-05	9.8572e-06	CD40LG/IL2/IL10/IL4	4
BP	GO:0007254	JNK cascade	6/37	214/18670	3.65366e-06	3.1467e-05	1.08725e-05	AKT1/CD40LG/TLR9/NCF1/IL1B/TNF	6
BP	GO:0032655	regulation of interleukin-12 production	4/37	54/18670	3.84524e-06	3.27767e-05	1.1325e-05	CD40LG/TLR9/IFNG/IL10	4
BP	GO:0050994	regulation of lipid catabolic process	4/37	54/18670	3.84524e-06	3.27767e-05	1.1325e-05	AKT1/IL1B/MTOR/TNF	4
BP	GO:0051353	positive regulation of oxidoreductase activity	4/37	54/18670	3.84524e-06	3.27767e-05	1.1325e-05	AKT1/IL1B/IFNG/TNF	4
BP	GO:0071496	cellular response to external stimulus	7/37	339/18670	3.94165e-06	3.33702e-05	1.15301e-05	AKT1/ALB/PTGS2/IL1B/ICAM1/MTOR/PPARG	7
BP	GO:0034116	positive regulation of heterotypic cell-cell adhesion	3/37	16/18670	3.94168e-06	3.33702e-05	1.15301e-05	IL1B/IL10/TNF	3
BP	GO:0016064	immunoglobulin mediated immune response	6/37	218/18670	4.06508e-06	3.42982e-05	1.18507e-05	CD40LG/CRP/IL2/IL10/IL4/TNF	6
BP	GO:0007584	response to nutrient	6/37	219/18670	4.17362e-06	3.5095e-05	1.21261e-05	PTGS2/CXCL10/IL1B/MTOR/PPARG/TYR	6
BP	GO:0001101	response to acid chemical	7/37	343/18670	4.25787e-06	3.5683e-05	1.23292e-05	AKT1/PTGS2/ICAM1/MTOR/RET/PPARG/TNF	7
BP	GO:0072503	cellular divalent inorganic cation homeostasis	8/37	493/18670	4.39416e-06	3.6609e-05	1.26491e-05	CALCA/F2/EDNRA/C5AR1/NOS1/CXCL10/TGM2/IL2	8
BP	GO:0019724	B cell mediated immunity	6/37	221/18670	4.39778e-06	3.6609e-05	1.26491e-05	CD40LG/CRP/IL2/IL10/IL4/TNF	6
BP	GO:0002381	immunoglobulin production involved in immunoglobulin mediated immune response	4/37	56/18670	4.45319e-06	3.68239e-05	1.27234e-05	CD40LG/IL2/IL10/IL4	4
BP	GO:0032615	interleukin-12 production	4/37	56/18670	4.45319e-06	3.68239e-05	1.27234e-05	CD40LG/TLR9/IFNG/IL10	4
BP	GO:0044706	multi-multicellular organism process	6/37	222/18670	4.51349e-06	3.71989e-05	1.2853e-05	AKT1/CALCA/PTGS2/IL1B/MTOR/MMP9	6
BP	GO:0051709	regulation of killing of cells of other organism	3/37	17/18670	4.77979e-06	3.92637e-05	1.35664e-05	NOS2/PRF1/IFNG	3
BP	GO:0031663	lipopolysaccharide-mediated signaling pathway	4/37	58/18670	5.12952e-06	4.19979e-05	1.45111e-05	AKT1/NOS3/IL1B/TNF	4
BP	GO:0001894	tissue homeostasis	6/37	229/18670	5.39477e-06	4.40248e-05	1.52115e-05	ALB/CALCA/NOS3/PTGS2/TLR9/IL6	6
BP	GO:2000351	regulation of endothelial cell apoptotic process	4/37	59/18670	5.4948e-06	4.46946e-05	1.54429e-05	CD40LG/ICAM1/IL4/TNF	4
BP	GO:0150078	positive regulation of neuroinflammatory response	3/37	18/18670	5.72792e-06	4.62883e-05	1.59936e-05	IL1B/IL6/TNF	3
BP	GO:1900221	regulation of amyloid-beta clearance	3/37	18/18670	5.72792e-06	4.62883e-05	1.59936e-05	IFNG/IL4/TNF	3
BP	GO:0002294	CD4-positive, alpha-beta T cell differentiation involved in immune response	4/37	60/18670	5.87896e-06	4.73551e-05	1.63622e-05	MTOR/IFNG/IL2/IL6	4
BP	GO:0002287	alpha-beta T cell activation involved in immune response	4/37	61/18670	6.28263e-06	5.01201e-05	1.73175e-05	MTOR/IFNG/IL2/IL6	4
BP	GO:0002293	alpha-beta T cell differentiation involved in immune response	4/37	61/18670	6.28263e-06	5.01201e-05	1.73175e-05	MTOR/IFNG/IL2/IL6	4
BP	GO:0030888	regulation of B cell proliferation	4/37	61/18670	6.28263e-06	5.01201e-05	1.73175e-05	TLR9/IL2/IL10/IL4	4
BP	GO:0032872	regulation of stress-activated MAPK cascade	6/37	237/18670	6.56837e-06	5.22322e-05	1.80473e-05	AKT1/CD40LG/TLR9/NCF1/IL1B/TNF	6
BP	GO:0002562	somatic diversification of immune receptors via germline recombination within a single locus	4/37	62/18670	6.70643e-06	5.28237e-05	1.82517e-05	CD40LG/IL2/IL10/IL4	4
BP	GO:0016444	somatic cell DNA recombination	4/37	62/18670	6.70643e-06	5.28237e-05	1.82517e-05	CD40LG/IL2/IL10/IL4	4
BP	GO:0031640	killing of cells of other organism	4/37	62/18670	6.70643e-06	5.28237e-05	1.82517e-05	F2/NOS2/PRF1/IFNG	4
BP	GO:0051607	defense response to virus	6/37	238/18670	6.72862e-06	5.28313e-05	1.82543e-05	TLR9/CXCL10/IL1B/PRF1/IFNG/IL6	6
BP	GO:0070302	regulation of stress-activated protein kinase signaling cascade	6/37	239/18670	6.89202e-06	5.39442e-05	1.86388e-05	AKT1/CD40LG/TLR9/NCF1/IL1B/TNF	6
BP	GO:0016445	somatic diversification of immunoglobulins	4/37	64/18670	7.61693e-06	5.92455e-05	2.04705e-05	CD40LG/IL2/IL10/IL4	4
BP	GO:0045670	regulation of osteoclast differentiation	4/37	64/18670	7.61693e-06	5.92455e-05	2.04705e-05	MTOR/IFNG/IL4/TNF	4
BP	GO:0050715	positive regulation of cytokine secretion	5/37	139/18670	7.6587e-06	5.93848e-05	2.05186e-05	IL1A/IL1B/IFNG/IL10/TNF	5
BP	GO:0046330	positive regulation of JNK cascade	5/37	140/18670	7.93101e-06	6.13052e-05	2.11822e-05	CD40LG/TLR9/NCF1/IL1B/TNF	5
BP	GO:0006525	arginine metabolic process	3/37	20/18670	7.98041e-06	6.14961e-05	2.12482e-05	NOS3/NOS1/NOS2	3
BP	GO:0032729	positive regulation of interferon-gamma production	4/37	65/18670	8.10494e-06	6.22629e-05	2.15131e-05	TLR9/IL1B/IL2/TNF	4
BP	GO:0097237	cellular response to toxic substance	6/37	247/18670	8.31896e-06	6.37104e-05	2.20132e-05	ALB/NOS3/PTGS2/IL10/IL6/TNF	6
BP	GO:0048545	response to steroid hormone	7/37	383/18670	8.76346e-06	6.69088e-05	2.31183e-05	PTGS2/ICAM1/IL10/IL6/PPARG/HNF4A/TNF	7
BP	GO:0010893	positive regulation of steroid biosynthetic process	3/37	21/18670	9.29778e-06	7.05554e-05	2.43783e-05	IL1B/IFNG/TNF	3
BP	GO:0035743	CD4-positive, alpha-beta T cell cytokine production	3/37	21/18670	9.29778e-06	7.05554e-05	2.43783e-05	IL1B/IL6/IL4	3
BP	GO:0002292	T cell differentiation involved in immune response	4/37	68/18670	9.70784e-06	7.33733e-05	2.5352e-05	MTOR/IFNG/IL2/IL6	4
BP	GO:0051384	response to glucocorticoid	5/37	146/18670	9.72808e-06	7.33733e-05	2.5352e-05	PTGS2/ICAM1/IL10/IL6/TNF	5
BP	GO:0050766	positive regulation of phagocytosis	4/37	69/18670	1.02907e-05	7.73822e-05	2.67371e-05	IL1B/IFNG/PPARG/TNF	4
BP	GO:0043406	positive regulation of MAP kinase activity	6/37	258/18670	1.06639e-05	7.96417e-05	2.75178e-05	C5AR1/CD40LG/TLR9/IL1B/RET/TNF	6
BP	GO:0014074	response to purine-containing compound	5/37	149/18670	1.07385e-05	7.96417e-05	2.75178e-05	CFTR/PTGS2/IL1B/PPARG/TYR	5
BP	GO:0051092	positive regulation of NF-kappaB transcription factor activity	5/37	149/18670	1.07385e-05	7.96417e-05	2.75178e-05	CD40LG/TLR9/IL1B/ICAM1/TNF	5
BP	GO:0031281	positive regulation of cyclase activity	3/37	22/18670	1.07512e-05	7.96417e-05	2.75178e-05	NOS3/NOS1/NOS2	3
BP	GO:0042359	vitamin D metabolic process	3/37	22/18670	1.07512e-05	7.96417e-05	2.75178e-05	IL1B/IFNG/TNF	3
BP	GO:0046883	regulation of hormone secretion	6/37	262/18670	1.16388e-05	8.59617e-05	2.97015e-05	CFTR/NOS2/IL1B/IFNG/HNF4A/TNF	6
BP	GO:0000187	activation of MAPK activity	5/37	152/18670	1.18291e-05	8.68514e-05	3.00089e-05	C5AR1/CD40LG/IL1B/RET/TNF	5
BP	GO:0032675	regulation of interleukin-6 production	5/37	152/18670	1.18291e-05	8.68514e-05	3.00089e-05	TLR9/IL1B/IL10/IL6/TNF	5
BP	GO:0050995	negative regulation of lipid catabolic process	3/37	23/18670	1.2347e-05	9.01219e-05	3.11389e-05	AKT1/IL1B/TNF	3
BP	GO:0051349	positive regulation of lyase activity	3/37	23/18670	1.2347e-05	9.01219e-05	3.11389e-05	NOS3/NOS1/NOS2	3
BP	GO:0002312	B cell activation involved in immune response	4/37	73/18670	1.28832e-05	9.34876e-05	3.23019e-05	CD40LG/IL2/IL10/IL4	4
BP	GO:0045685	regulation of glial cell differentiation	4/37	73/18670	1.28832e-05	9.34876e-05	3.23019e-05	F2/MTOR/IL6/PPARG	4
BP	GO:0034767	positive regulation of ion transmembrane transport	5/37	156/18670	1.34159e-05	9.70701e-05	3.35397e-05	F2/NOS1/CFTR/CXCL10/IFNG	5
BP	GO:0043367	CD4-positive, alpha-beta T cell differentiation	4/37	74/18670	1.36001e-05	9.78344e-05	3.38038e-05	MTOR/IFNG/IL2/IL6	4
BP	GO:1900182	positive regulation of protein localization to nucleus	4/37	74/18670	1.36001e-05	9.78344e-05	3.38038e-05	AKT1/F2/PTGS2/IFNG	4
BP	GO:0043467	regulation of generation of precursor metabolites and energy	5/37	157/18670	1.38374e-05	9.92542e-05	3.42944e-05	AKT1/NOS2/MTOR/IFNG/IL4	5
BP	GO:0009110	vitamin biosynthetic process	3/37	24/18670	1.40915e-05	0.000100787	3.48239e-05	IL1B/IFNG/TNF	3
BP	GO:0002200	somatic diversification of immune receptors	4/37	75/18670	1.4346e-05	0.000102082	3.52713e-05	CD40LG/IL2/IL10/IL4	4
BP	GO:0032868	response to insulin	6/37	272/18670	1.43956e-05	0.000102082	3.52713e-05	AKT1/IL1B/ICAM1/MTOR/IL10/PPARG	6
BP	GO:1902105	regulation of leukocyte differentiation	6/37	272/18670	1.43956e-05	0.000102082	3.52713e-05	TLR9/MTOR/IFNG/IL2/IL4/TNF	6
BP	GO:0030099	myeloid cell differentiation	7/37	416/18670	1.49791e-05	0.000105918	3.65967e-05	MB/MTOR/MMP9/IFNG/PPARG/IL4/TNF	7
BP	GO:0042310	vasoconstriction	4/37	76/18670	1.51216e-05	0.000106321	3.67362e-05	AKT1/EDNRA/PTGS2/ICAM1	4
BP	GO:0045454	cell redox homeostasis	4/37	76/18670	1.51216e-05	0.000106321	3.67362e-05	NOS3/NOS1/NCF1/NOS2	4
BP	GO:0031960	response to corticosteroid	5/37	162/18670	1.61025e-05	0.000112899	3.9009e-05	PTGS2/ICAM1/IL10/IL6/TNF	5
BP	GO:0015718	monocarboxylic acid transport	5/37	163/18670	1.65884e-05	0.000115893	4.00434e-05	AKT1/PLA2G2A/NOS2/IL1B/PPARG	5
BP	GO:0060485	mesenchyme development	6/37	279/18670	1.66227e-05	0.000115893	4.00434e-05	EDNRA/NOS3/IL1B/MTOR/IL6/RET	6
BP	GO:0010827	regulation of glucose transmembrane transport	4/37	78/18670	1.67649e-05	0.000116558	4.02733e-05	AKT1/EDNRA/IL1B/TNF	4
BP	GO:0032409	regulation of transporter activity	6/37	283/18670	1.80154e-05	0.000124467	4.30058e-05	NOS1/CFTR/TLR9/MMP9/IFNG/PPARG	6
BP	GO:0034114	regulation of heterotypic cell-cell adhesion	3/37	26/18670	1.80524e-05	0.000124467	4.30058e-05	IL1B/IL10/TNF	3
BP	GO:1903959	regulation of anion transmembrane transport	3/37	26/18670	1.80524e-05	0.000124467	4.30058e-05	AKT1/CFTR/MTOR	3
BP	GO:0051403	stress-activated MAPK cascade	6/37	286/18670	1.91206e-05	0.000131467	4.54246e-05	AKT1/CD40LG/TLR9/NCF1/IL1B/TNF	6
BP	GO:0006816	calcium ion transport	7/37	434/18670	1.96819e-05	0.000134954	4.66294e-05	F2/NOS3/NOS1/PTGS2/TLR9/CXCL10/ICAM1	7
BP	GO:0050728	negative regulation of inflammatory response	5/37	169/18670	1.97485e-05	0.000135039	4.66586e-05	F2/IL2/IL10/PPARG/IL4	5
BP	GO:0043434	response to peptide hormone	7/37	436/18670	2.02725e-05	0.000137924	4.76554e-05	AKT1/PTGS2/IL1B/ICAM1/MTOR/IL10/PPARG	7
BP	GO:0046885	regulation of hormone biosynthetic process	3/37	27/18670	2.02813e-05	0.000137924	4.76554e-05	IL1B/IFNG/TNF	3
BP	GO:0032874	positive regulation of stress-activated MAPK cascade	5/37	172/18670	2.14949e-05	0.000145779	5.03696e-05	CD40LG/TLR9/NCF1/IL1B/TNF	5
BP	GO:0001659	temperature homeostasis	5/37	173/18670	2.2103e-05	0.00014909	5.15138e-05	PTGS2/IL1A/IL1B/IL4/TNF	5
BP	GO:0070304	positive regulation of stress-activated protein kinase signaling cascade	5/37	173/18670	2.2103e-05	0.00014909	5.15138e-05	CD40LG/TLR9/NCF1/IL1B/TNF	5
BP	GO:0002718	regulation of cytokine production involved in immune response	4/37	84/18670	2.24861e-05	0.000151265	5.2265e-05	IL1B/IL10/IL6/TNF	4
BP	GO:0009065	glutamine family amino acid catabolic process	3/37	28/18670	2.2684e-05	0.000151776	5.24415e-05	NOS3/NOS1/NOS2	3
BP	GO:1902932	positive regulation of alcohol biosynthetic process	3/37	28/18670	2.2684e-05	0.000151776	5.24415e-05	IL1B/IFNG/TNF	3
BP	GO:1904705	regulation of vascular associated smooth muscle cell proliferation	4/37	85/18670	2.35632e-05	0.000156815	5.41827e-05	MMP9/IL10/PPARG/TNF	4
BP	GO:1990874	vascular associated smooth muscle cell proliferation	4/37	85/18670	2.35632e-05	0.000156815	5.41827e-05	MMP9/IL10/PPARG/TNF	4
BP	GO:1903522	regulation of blood circulation	6/37	297/18670	2.36517e-05	0.000156984	5.42412e-05	AKT1/NOS3/NOS1/PTGS2/ICAM1/IL2	6
BP	GO:0001936	regulation of endothelial cell proliferation	5/37	176/18670	2.4008e-05	0.000158925	5.49119e-05	AKT1/MTOR/IL10/PPARG/TNF	5
BP	GO:0007263	nitric oxide mediated signal transduction	3/37	29/18670	2.52669e-05	0.000166815	5.7638e-05	NOS3/NOS1/NOS2	3
BP	GO:0002690	positive regulation of leukocyte chemotaxis	4/37	87/18670	2.58304e-05	0.000170085	5.87677e-05	C5AR1/CXCL10/CXCL8/IL6	4
BP	GO:0071347	cellular response to interleukin-1	5/37	179/18670	2.60384e-05	0.000171002	5.90845e-05	CXCL8/IL1A/IL1B/ICAM1/IL6	5
BP	GO:0010565	regulation of cellular ketone metabolic process	5/37	180/18670	2.67441e-05	0.000175174	6.0526e-05	AKT1/PTGS2/IL1B/MTOR/PPARG	5
BP	GO:0050829	defense response to Gram-negative bacterium	4/37	88/18670	2.70222e-05	0.000176531	6.09951e-05	F2/TLR9/NOS2/IL6	4
BP	GO:0010743	regulation of macrophage derived foam cell differentiation	3/37	30/18670	2.8036e-05	0.000181723	6.2789e-05	PLA2G2A/CRP/PPARG	3
BP	GO:0045940	positive regulation of steroid metabolic process	3/37	30/18670	2.8036e-05	0.000181723	6.2789e-05	IL1B/IFNG/TNF	3
BP	GO:0046320	regulation of fatty acid oxidation	3/37	30/18670	2.8036e-05	0.000181723	6.2789e-05	AKT1/MTOR/PPARG	3
BP	GO:0043123	positive regulation of I-kappaB kinase/NF-kappaB signaling	5/37	183/18670	2.89507e-05	0.000187077	6.4639e-05	AKT1/TLR9/IL1B/TGM2/TNF	5
BP	GO:0009895	negative regulation of catabolic process	6/37	308/18670	2.90124e-05	0.000187077	6.4639e-05	AKT1/NOS2/IL1B/MTOR/IL10/TNF	6
BP	GO:0050864	regulation of B cell activation	5/37	184/18670	2.97168e-05	0.000191124	6.60374e-05	TLR9/IL2/IL10/IL6/IL4	5
BP	GO:0042113	B cell activation	6/37	310/18670	3.00846e-05	0.000192991	6.66823e-05	CD40LG/TLR9/IL2/IL10/IL6/IL4	6
BP	GO:0043457	regulation of cellular respiration	3/37	31/18670	3.09975e-05	0.000197828	6.83535e-05	NOS2/IFNG/IL4	3
BP	GO:0045742	positive regulation of epidermal growth factor receptor signaling pathway	3/37	31/18670	3.09975e-05	0.000197828	6.83535e-05	AKT1/NCF1/MMP9	3
BP	GO:0034612	response to tumor necrosis factor	6/37	312/18670	3.11885e-05	0.000198538	6.85987e-05	AKT1/CD40LG/PTGS2/CXCL8/ICAM1/TNF	6
BP	GO:1901214	regulation of neuron death	6/37	313/18670	3.17526e-05	0.000201613	6.96612e-05	AKT1/C5AR1/MTOR/IFNG/IL10/TNF	6
BP	GO:0035710	CD4-positive, alpha-beta T cell activation	4/37	92/18670	3.21965e-05	0.000203911	7.04554e-05	MTOR/IFNG/IL2/IL6	4
BP	GO:0031098	stress-activated protein kinase signaling cascade	6/37	315/18670	3.29053e-05	0.000207872	7.18238e-05	AKT1/CD40LG/TLR9/NCF1/IL1B/TNF	6
BP	GO:0033273	response to vitamin	4/37	93/18670	3.3596e-05	0.000211163	7.2961e-05	PTGS2/CXCL10/PPARG/TYR	4
BP	GO:1901655	cellular response to ketone	4/37	93/18670	3.3596e-05	0.000211163	7.2961e-05	AKT1/CFTR/ICAM1/PPARG	4
BP	GO:0003012	muscle system process	7/37	472/18670	3.36875e-05	0.000211204	7.29754e-05	EDNRA/MB/NOS3/NOS1/PTGS2/IL1B/MTOR	7
BP	GO:0045907	positive regulation of vasoconstriction	3/37	32/18670	3.41575e-05	0.000213613	7.38077e-05	AKT1/PTGS2/ICAM1	3
BP	GO:0001935	endothelial cell proliferation	5/37	191/18670	3.55312e-05	0.000221647	7.65835e-05	AKT1/MTOR/IL10/PPARG/TNF	5
BP	GO:0043112	receptor metabolic process	5/37	192/18670	3.64291e-05	0.00022668	7.83225e-05	CXCL8/IFNG/IL10/PPARG/TNF	5
BP	GO:0044070	regulation of anion transport	4/37	95/18670	3.65281e-05	0.00022673	7.83396e-05	AKT1/CFTR/IL1B/MTOR	4
BP	GO:0070838	divalent metal ion transport	7/37	479/18670	3.69983e-05	0.000229077	7.91506e-05	F2/NOS3/NOS1/PTGS2/TLR9/CXCL10/ICAM1	7
BP	GO:0045191	regulation of isotype switching	3/37	33/18670	3.7522e-05	0.000231169	7.98735e-05	IL2/IL10/IL4	3
BP	GO:1901186	positive regulation of ERBB signaling pathway	3/37	33/18670	3.7522e-05	0.000231169	7.98735e-05	AKT1/NCF1/MMP9	3
BP	GO:0032755	positive regulation of interleukin-6 production	4/37	96/18670	3.80625e-05	0.00023392	8.0824e-05	TLR9/IL1B/IL6/TNF	4
BP	GO:1903829	positive regulation of cellular protein localization	6/37	324/18670	3.85176e-05	0.000236134	8.15889e-05	AKT1/F2/PTGS2/IL1B/IFNG/TNF	6
BP	GO:0030316	osteoclast differentiation	4/37	97/18670	3.96435e-05	0.000242439	8.37676e-05	MTOR/IFNG/IL4/TNF	4
BP	GO:0046677	response to antibiotic	6/37	327/18670	4.05505e-05	0.00024691	8.53125e-05	MB/CFTR/ICAM1/IL2/IL10/IL6	6
BP	GO:0072511	divalent inorganic cation transport	7/37	486/18670	4.0573e-05	0.00024691	8.53125e-05	F2/NOS3/NOS1/PTGS2/TLR9/CXCL10/ICAM1	7
BP	GO:0032660	regulation of interleukin-17 production	3/37	34/18670	4.1097e-05	0.000248882	8.59938e-05	IFNG/IL2/IL6	3
BP	GO:0042533	tumor necrosis factor biosynthetic process	3/37	34/18670	4.1097e-05	0.000248882	8.59938e-05	IFNG/IL10/IL4	3
BP	GO:0050764	regulation of phagocytosis	4/37	98/18670	4.12721e-05	0.000249336	8.61505e-05	IL1B/IFNG/PPARG/TNF	4
BP	GO:0007200	phospholipase C-activating G protein-coupled receptor signaling pathway	4/37	100/18670	4.46755e-05	0.000269223	9.30221e-05	CALCA/F2/C5AR1/TGM2	4
BP	GO:0032735	positive regulation of interleukin-12 production	3/37	35/18670	4.48886e-05	0.000269223	9.30221e-05	CD40LG/TLR9/IFNG	3
BP	GO:0042092	type 2 immune response	3/37	35/18670	4.48886e-05	0.000269223	9.30221e-05	IL10/IL6/IL4	3
BP	GO:0046632	alpha-beta T cell differentiation	4/37	101/18670	4.64521e-05	0.000277931	9.60308e-05	MTOR/IFNG/IL2/IL6	4
BP	GO:0043405	regulation of MAP kinase activity	6/37	337/18670	4.79589e-05	0.000286258	9.8908e-05	C5AR1/CD40LG/TLR9/IL1B/RET/TNF	6
BP	GO:0098869	cellular oxidant detoxification	4/37	102/18670	4.82798e-05	0.000287484	9.93317e-05	ALB/NOS3/PTGS2/TNF	4
BP	GO:1901605	alpha-amino acid metabolic process	5/37	204/18670	4.86394e-05	0.000288934	9.98326e-05	NOS3/NOS1/NOS2/TYR/HNF4A	5
BP	GO:0010742	macrophage derived foam cell differentiation	3/37	36/18670	4.89025e-05	0.000289117	9.98959e-05	PLA2G2A/CRP/PPARG	3
BP	GO:0090077	foam cell differentiation	3/37	36/18670	4.89025e-05	0.000289117	9.98959e-05	PLA2G2A/CRP/PPARG	3
BP	GO:0034766	negative regulation of ion transmembrane transport	4/37	103/18670	5.01596e-05	0.000295846	0.000102221	AKT1/TLR9/MTOR/MMP9	4
BP	GO:1904062	regulation of cation transmembrane transport	6/37	342/18670	5.20502e-05	0.000304617	0.000105251	F2/NOS1/TLR9/CXCL10/MMP9/IFNG	6
BP	GO:0030593	neutrophil chemotaxis	4/37	104/18670	5.20923e-05	0.000304617	0.000105251	C5AR1/CXCL10/CXCL8/IL1B	4
BP	GO:0071887	leukocyte apoptotic process	4/37	104/18670	5.20923e-05	0.000304617	0.000105251	AKT1/IL2/IL10/IL6	4
BP	GO:0070555	response to interleukin-1	5/37	207/18670	5.21361e-05	0.000304617	0.000105251	CXCL8/IL1A/IL1B/ICAM1/IL6	5
BP	GO:0002714	positive regulation of B cell mediated immunity	3/37	37/18670	5.31449e-05	0.000306198	0.000105798	IL2/IL4/TNF	3
BP	GO:0002891	positive regulation of immunoglobulin mediated immune response	3/37	37/18670	5.31449e-05	0.000306198	0.000105798	IL2/IL4/TNF	3
BP	GO:0033280	response to vitamin D	3/37	37/18670	5.31449e-05	0.000306198	0.000105798	PTGS2/CXCL10/TYR	3
BP	GO:0034405	response to fluid shear stress	3/37	37/18670	5.31449e-05	0.000306198	0.000105798	AKT1/NOS3/PTGS2	3
BP	GO:0045923	positive regulation of fatty acid metabolic process	3/37	37/18670	5.31449e-05	0.000306198	0.000105798	PTGS2/IL1B/PPARG	3
BP	GO:0071276	cellular response to cadmium ion	3/37	37/18670	5.31449e-05	0.000306198	0.000105798	AKT1/NCF1/MMP9	3
BP	GO:0071229	cellular response to acid chemical	5/37	209/18670	5.45731e-05	0.000313701	0.00010839	AKT1/MTOR/RET/PPARG/TNF	5
BP	GO:0009612	response to mechanical stimulus	5/37	210/18670	5.58243e-05	0.000320153	0.00011062	AKT1/PTGS2/CXCL10/IL1B/PPARG	5
BP	GO:0070997	neuron death	6/37	348/18670	5.73247e-05	0.000328003	0.000113332	AKT1/C5AR1/MTOR/IFNG/IL10/TNF	6
BP	GO:0032350	regulation of hormone metabolic process	3/37	38/18670	5.76215e-05	0.000328192	0.000113397	IL1B/IFNG/TNF	3
BP	GO:0032620	interleukin-17 production	3/37	38/18670	5.76215e-05	0.000328192	0.000113397	IFNG/IL2/IL6	3
BP	GO:0001909	leukocyte mediated cytotoxicity	4/37	107/18670	5.82174e-05	0.000330829	0.000114308	F2/NOS2/PRF1/ICAM1	4
BP	GO:0051052	regulation of DNA metabolic process	6/37	351/18670	6.01181e-05	0.000340852	0.000117771	AKT1/IL2/IL10/IL6/PPARG/IL4	6
BP	GO:1904659	glucose transmembrane transport	4/37	108/18670	6.03711e-05	0.000341509	0.000117998	AKT1/EDNRA/IL1B/TNF	4
BP	GO:0043281	regulation of cysteine-type endopeptidase activity involved in apoptotic process	5/37	215/18670	6.24166e-05	0.000352279	0.000121719	AKT1/PTGS2/MMP9/PPARG/TNF	5
BP	GO:0072676	lymphocyte migration	4/37	111/18670	6.71818e-05	0.000377278	0.000130357	AKT1/CXCL10/ICAM1/RET	4
BP	GO:0002369	T cell cytokine production	3/37	40/18670	6.73007e-05	0.000377278	0.000130357	IL1B/IL6/IL4	3
BP	GO:0042036	negative regulation of cytokine biosynthetic process	3/37	40/18670	6.73007e-05	0.000377278	0.000130357	IL10/IL6/IL4	3
BP	GO:0051651	maintenance of location in cell	5/37	219/18670	6.8111e-05	0.000380962	0.00013163	AKT1/ALB/F2/NOS1/CXCL10	5
BP	GO:0008645	hexose transmembrane transport	4/37	112/18670	6.95717e-05	0.000386658	0.000133598	AKT1/EDNRA/IL1B/TNF	4
BP	GO:1990748	cellular detoxification	4/37	112/18670	6.95717e-05	0.000386658	0.000133598	ALB/NOS3/PTGS2/TNF	4
BP	GO:0048762	mesenchymal cell differentiation	5/37	220/18670	6.95953e-05	0.000386658	0.000133598	EDNRA/IL1B/MTOR/IL6/RET	5
BP	GO:0010038	response to metal ion	6/37	362/18670	7.13085e-05	0.000394415	0.000136278	AKT1/PTGS2/NCF1/IL1A/ICAM1/MMP9	6
BP	GO:0031331	positive regulation of cellular catabolic process	6/37	362/18670	7.13085e-05	0.000394415	0.000136278	AKT1/IL1B/IFNG/IL6/IL4/TNF	6
BP	GO:0030890	positive regulation of B cell proliferation	3/37	41/18670	7.25149e-05	0.000398432	0.000137666	TLR9/IL2/IL4	3
BP	GO:0050873	brown fat cell differentiation	3/37	41/18670	7.25149e-05	0.000398432	0.000137666	MB/PTGS2/MTOR	3
BP	GO:0061028	establishment of endothelial barrier	3/37	41/18670	7.25149e-05	0.000398432	0.000137666	IL1B/ICAM1/TNF	3
BP	GO:0002688	regulation of leukocyte chemotaxis	4/37	114/18670	7.45365e-05	0.000407739	0.000140882	C5AR1/CXCL10/CXCL8/IL6	4
BP	GO:0015749	monosaccharide transmembrane transport	4/37	114/18670	7.45365e-05	0.000407739	0.000140882	AKT1/EDNRA/IL1B/TNF	4
BP	GO:0032963	collagen metabolic process	4/37	115/18670	7.71135e-05	0.000420911	0.000145433	F2/MMP9/IL6/PPARG	4
BP	GO:0006909	phagocytosis	6/37	369/18670	7.92571e-05	0.000431665	0.000149149	CRP/IL1B/TGM2/IFNG/PPARG/TNF	6
BP	GO:0034219	carbohydrate transmembrane transport	4/37	116/18670	7.97548e-05	0.000432483	0.000149432	AKT1/EDNRA/IL1B/TNF	4
BP	GO:1900180	regulation of protein localization to nucleus	4/37	116/18670	7.97548e-05	0.000432483	0.000149432	AKT1/F2/PTGS2/IFNG	4
BP	GO:0002761	regulation of myeloid leukocyte differentiation	4/37	117/18670	8.24614e-05	0.000446188	0.000154167	MTOR/IFNG/IL4/TNF	4
BP	GO:0006775	fat-soluble vitamin metabolic process	3/37	43/18670	8.37212e-05	0.000451043	0.000155845	IL1B/IFNG/TNF	3
BP	GO:0031279	regulation of cyclase activity	3/37	43/18670	8.37212e-05	0.000451043	0.000155845	NOS3/NOS1/NOS2	3
BP	GO:1990266	neutrophil migration	4/37	118/18670	8.52343e-05	0.000458203	0.000158319	C5AR1/CXCL10/CXCL8/IL1B	4
BP	GO:0009743	response to carbohydrate	5/37	230/18670	8.58544e-05	0.000460542	0.000159127	CFTR/PTGS2/IL1B/ICAM1/HNF4A	5
BP	GO:0032965	regulation of collagen biosynthetic process	3/37	44/18670	8.97246e-05	0.000480268	0.000165942	F2/IL6/PPARG	3
BP	GO:0050678	regulation of epithelial cell proliferation	6/37	378/18670	9.05016e-05	0.000483387	0.00016702	AKT1/C5AR1/MTOR/IL10/PPARG/TNF	6
BP	GO:0097305	response to alcohol	5/37	233/18670	9.1261e-05	0.000486399	0.000168061	AKT1/CFTR/ICAM1/IL2/PPARG	5
BP	GO:0071453	cellular response to oxygen levels	5/37	234/18670	9.31202e-05	0.000494431	0.000170836	AKT1/PTGS2/ICAM1/MTOR/PPARG	5
BP	GO:0006869	lipid transport	6/37	380/18670	9.31653e-05	0.000494431	0.000170836	AKT1/PLA2G2A/CFTR/NOS2/IL1B/PPARG	6
BP	GO:0042176	regulation of protein catabolic process	6/37	381/18670	9.45204e-05	0.000500556	0.000172952	AKT1/NOS2/IL1B/IFNG/IL10/TNF	6
BP	GO:0031018	endocrine pancreas development	3/37	45/18670	9.60024e-05	0.00050625	0.00017492	AKT1/IL6/HNF4A	3
BP	GO:0032309	icosanoid secretion	3/37	45/18670	9.60024e-05	0.00050625	0.00017492	PLA2G2A/NOS2/IL1B	3
BP	GO:0019730	antimicrobial humoral response	4/37	122/18670	9.70085e-05	0.000510474	0.000176379	F2/PLA2G2A/CXCL10/CXCL8	4
BP	GO:0031669	cellular response to nutrient levels	5/37	237/18670	9.88736e-05	0.000518098	0.000179013	ALB/PTGS2/ICAM1/MTOR/PPARG	5
BP	GO:0043122	regulation of I-kappaB kinase/NF-kappaB signaling	5/37	237/18670	9.88736e-05	0.000518098	0.000179013	AKT1/TLR9/IL1B/TGM2/TNF	5
BP	GO:0071621	granulocyte chemotaxis	4/37	123/18670	0.000100128	0.000523567	0.000180903	C5AR1/CXCL10/CXCL8/IL1B	4
BP	GO:0002437	inflammatory response to antigenic stimulus	3/37	46/18670	0.00010256	0.000530052	0.000183144	ICAM1/IL10/TNF	3
BP	GO:0045776	negative regulation of blood pressure	3/37	46/18670	0.00010256	0.000530052	0.000183144	NOS3/NOS1/NOS2	3
BP	GO:0051339	regulation of lyase activity	3/37	46/18670	0.00010256	0.000530052	0.000183144	NOS3/NOS1/NOS2	3
BP	GO:0071675	regulation of mononuclear cell migration	3/37	46/18670	0.00010256	0.000530052	0.000183144	C5AR1/CXCL10/TNF	3
BP	GO:1904036	negative regulation of epithelial cell apoptotic process	3/37	46/18670	0.00010256	0.000530052	0.000183144	ICAM1/MTOR/IL4	3
BP	GO:0031348	negative regulation of defense response	5/37	239/18670	0.000102859	0.000530052	0.000183144	F2/IL2/IL10/PPARG/IL4	5
BP	GO:2000116	regulation of cysteine-type endopeptidase activity	5/37	239/18670	0.000102859	0.000530052	0.000183144	AKT1/PTGS2/MMP9/PPARG/TNF	5
BP	GO:0030217	T cell differentiation	5/37	240/18670	0.000104897	0.000539439	0.000186387	MTOR/IFNG/IL2/IL6/IL4	5
BP	GO:0042593	glucose homeostasis	5/37	241/18670	0.000106966	0.000548946	0.000189672	AKT1/CFTR/ICAM1/PPARG/HNF4A	5
BP	GO:0033500	carbohydrate homeostasis	5/37	242/18670	0.000109067	0.000558574	0.000192999	AKT1/CFTR/ICAM1/PPARG/HNF4A	5
BP	GO:0042180	cellular ketone metabolic process	5/37	246/18670	0.000117788	0.000600767	0.000207577	AKT1/PTGS2/IL1B/MTOR/PPARG	5
BP	GO:0048872	homeostasis of number of cells	5/37	246/18670	0.000117788	0.000600767	0.000207577	AKT1/MB/NOS3/IL2/IL6	5
BP	GO:0032102	negative regulation of response to external stimulus	6/37	400/18670	0.000123405	0.000624615	0.000215817	F2/NOS3/IL2/IL10/PPARG/IL4	6
BP	GO:0010712	regulation of collagen metabolic process	3/37	49/18670	0.000123969	0.000624615	0.000215817	F2/IL6/PPARG	3
BP	GO:0032757	positive regulation of interleukin-8 production	3/37	49/18670	0.000123969	0.000624615	0.000215817	TLR9/IL1B/TNF	3
BP	GO:0071715	icosanoid transport	3/37	49/18670	0.000123969	0.000624615	0.000215817	PLA2G2A/NOS2/IL1B	3
BP	GO:1901571	fatty acid derivative transport	3/37	49/18670	0.000123969	0.000624615	0.000215817	PLA2G2A/NOS2/IL1B	3
BP	GO:1904707	positive regulation of vascular associated smooth muscle cell proliferation	3/37	49/18670	0.000123969	0.000624615	0.000215817	MMP9/IL10/TNF	3
BP	GO:0030183	B cell differentiation	4/37	131/18670	0.00012777	0.000642465	0.000221985	CD40LG/TLR9/IL10/IL4	4
BP	GO:0003158	endothelium development	4/37	132/18670	0.000131577	0.000659573	0.000227896	CXCL10/IL1B/ICAM1/TNF	4
BP	GO:0010718	positive regulation of epithelial to mesenchymal transition	3/37	50/18670	0.000131703	0.000659573	0.000227896	IL1B/MTOR/IL6	3
BP	GO:0002920	regulation of humoral immune response	4/37	134/18670	0.000139437	0.000694115	0.000239831	F2/C5AR1/IL1B/TNF	4
BP	GO:0006766	vitamin metabolic process	4/37	134/18670	0.000139437	0.000694115	0.000239831	IL1B/PRSS1/IFNG/TNF	4
BP	GO:0046683	response to organophosphorus	4/37	134/18670	0.000139437	0.000694115	0.000239831	CFTR/PTGS2/IL1B/TYR	4
BP	GO:0050921	positive regulation of chemotaxis	4/37	135/18670	0.000143491	0.000712874	0.000246313	C5AR1/CXCL10/CXCL8/IL6	4
BP	GO:0006968	cellular defense response	3/37	52/18670	0.000148097	0.000734289	0.000253712	C5AR1/NCF1/PRF1	3
BP	GO:0034605	cellular response to heat	4/37	137/18670	0.000151856	0.000749941	0.00025912	PTGS2/CXCL10/IL1A/MTOR	4
BP	GO:0098754	detoxification	4/37	137/18670	0.000151856	0.000749941	0.00025912	ALB/NOS3/PTGS2/TNF	4
BP	GO:0032412	regulation of ion transmembrane transporter activity	5/37	260/18670	0.0001526	0.000751761	0.000259749	NOS1/CFTR/TLR9/MMP9/IFNG	5
BP	GO:0001558	regulation of cell growth	6/37	416/18670	0.000152829	0.000751761	0.000259749	AKT1/F2/MTOR/IL2/PPARG/HNF4A	6
BP	GO:0046631	alpha-beta T cell activation	4/37	138/18670	0.000156169	0.000766596	0.000264874	MTOR/IFNG/IL2/IL6	4
BP	GO:0032715	negative regulation of interleukin-6 production	3/37	53/18670	0.000156769	0.000766596	0.000264874	TLR9/IL10/TNF	3
BP	GO:0032964	collagen biosynthetic process	3/37	53/18670	0.000156769	0.000766596	0.000264874	F2/IL6/PPARG	3
BP	GO:0097530	granulocyte migration	4/37	141/18670	0.000169638	0.000821264	0.000283764	C5AR1/CXCL10/CXCL8/IL1B	4
BP	GO:1901617	organic hydroxy compound biosynthetic process	5/37	266/18670	0.000169727	0.000821264	0.000283764	CFTR/IL1B/IFNG/TYR/TNF	5
BP	GO:0014041	regulation of neuron maturation	2/37	10/18670	0.000170258	0.000821264	0.000283764	MTOR/RET	2
BP	GO:0032621	interleukin-18 production	2/37	10/18670	0.000170258	0.000821264	0.000283764	TLR9/IL10	2
BP	GO:0045792	negative regulation of cell size	2/37	10/18670	0.000170258	0.000821264	0.000283764	AKT1/MTOR	2
BP	GO:0048304	positive regulation of isotype switching to IgG isotypes	2/37	10/18670	0.000170258	0.000821264	0.000283764	IL2/IL4	2
BP	GO:1900222	negative regulation of amyloid-beta clearance	2/37	10/18670	0.000170258	0.000821264	0.000283764	IFNG/TNF	2
BP	GO:0009896	positive regulation of catabolic process	6/37	425/18670	0.000171677	0.000826505	0.000285574	AKT1/IL1B/IFNG/IL6/IL4/TNF	6
BP	GO:0050871	positive regulation of B cell activation	4/37	142/18670	0.000174309	0.000837556	0.000289393	TLR9/IL2/IL6/IL4	4
BP	GO:0022898	regulation of transmembrane transporter activity	5/37	268/18670	0.00017575	0.000841236	0.000290664	NOS1/CFTR/TLR9/MMP9/IFNG	5
BP	GO:0031668	cellular response to extracellular stimulus	5/37	268/18670	0.00017575	0.000841236	0.000290664	ALB/PTGS2/ICAM1/MTOR/PPARG	5
BP	GO:0007249	I-kappaB kinase/NF-kappaB signaling	5/37	269/18670	0.000178823	0.000852663	0.000294612	AKT1/TLR9/IL1B/TGM2/TNF	5
BP	GO:0043491	protein kinase B signaling	5/37	269/18670	0.000178823	0.000852663	0.000294612	AKT1/IL1B/MTOR/RET/TNF	5
BP	GO:1902107	positive regulation of leukocyte differentiation	4/37	144/18670	0.000183928	0.000873658	0.000301866	IFNG/IL2/IL4/TNF	4
BP	GO:1904064	positive regulation of cation transmembrane transport	4/37	144/18670	0.000183928	0.000873658	0.000301866	F2/NOS1/CXCL10/IFNG	4
BP	GO:1903078	positive regulation of protein localization to plasma membrane	3/37	56/18670	0.000184747	0.000875878	0.000302634	AKT1/IFNG/TNF	3
BP	GO:0048608	reproductive structure development	6/37	431/18670	0.000185234	0.000876517	0.000302854	AKT1/NOS3/PTGS2/ICAM1/IL10/PPARG	6
BP	GO:0048732	gland development	6/37	434/18670	0.000192324	0.000904904	0.000312663	AKT1/TGM2/IL10/TYR/HNF4A/TNF	6
BP	GO:0050673	epithelial cell proliferation	6/37	434/18670	0.000192324	0.000904904	0.000312663	AKT1/C5AR1/MTOR/IL10/PPARG/TNF	6
BP	GO:0061458	reproductive system development	6/37	434/18670	0.000192324	0.000904904	0.000312663	AKT1/NOS3/PTGS2/ICAM1/IL10/PPARG	6
BP	GO:0002683	negative regulation of immune system process	6/37	435/18670	0.000194734	0.000914517	0.000315984	AKT1/IL2/IL10/PPARG/IL4/TNF	6
BP	GO:0016054	organic acid catabolic process	5/37	275/18670	0.000198131	0.000926972	0.000320288	AKT1/NOS3/NOS1/NOS2/MTOR	5
BP	GO:0046395	carboxylic acid catabolic process	5/37	275/18670	0.000198131	0.000926972	0.000320288	AKT1/NOS3/NOS1/NOS2/MTOR	5
BP	GO:0008643	carbohydrate transport	4/37	148/18670	0.00020431	0.000950584	0.000328446	AKT1/EDNRA/IL1B/TNF	4
BP	GO:0014065	phosphatidylinositol 3-kinase signaling	4/37	148/18670	0.00020431	0.000950584	0.000328446	AKT1/F2/NCF1/TNF	4
BP	GO:0060249	anatomical structure homeostasis	6/37	439/18670	0.000204617	0.000950584	0.000328446	ALB/CALCA/NOS3/PTGS2/TLR9/IL6	6
BP	GO:0019229	regulation of vasoconstriction	3/37	58/18670	0.000205088	0.000950584	0.000328446	AKT1/PTGS2/ICAM1	3
BP	GO:0042093	T-helper cell differentiation	3/37	58/18670	0.000205088	0.000950584	0.000328446	MTOR/IL2/IL6	3
BP	GO:0032494	response to peptidoglycan	2/37	11/18670	0.000207833	0.000959735	0.000331608	C5AR1/IL6	2
BP	GO:0051024	positive regulation of immunoglobulin secretion	2/37	11/18670	0.000207833	0.000959735	0.000331608	IL2/IL6	2
BP	GO:0009165	nucleotide biosynthetic process	5/37	278/18670	0.000208364	0.000960402	0.000331838	NOS3/NOS1/PTGS2/NOS2/IL4	5
BP	GO:0050777	negative regulation of immune response	4/37	150/18670	0.000215089	0.000989093	0.000341752	IL2/IL10/PPARG/TNF	4
BP	GO:0001885	endothelial cell development	3/37	59/18670	0.00021578	0.000989093	0.000341752	IL1B/ICAM1/TNF	3
BP	GO:0043388	positive regulation of DNA binding	3/37	59/18670	0.00021578	0.000989093	0.000341752	MMP9/IFNG/PPARG	3
BP	GO:1901293	nucleoside phosphate biosynthetic process	5/37	282/18670	0.000222629	0.00101861	0.000351951	NOS3/NOS1/PTGS2/NOS2/IL4	5
BP	GO:0001890	placenta development	4/37	152/18670	0.000226274	0.00102961	0.00035575	AKT1/PTGS2/IL10/PPARG	4
BP	GO:0034250	positive regulation of cellular amide metabolic process	4/37	152/18670	0.000226274	0.00102961	0.00035575	MTOR/IFNG/IL6/TNF	4
BP	GO:1903169	regulation of calcium ion transmembrane transport	4/37	152/18670	0.000226274	0.00102961	0.00035575	F2/NOS1/TLR9/CXCL10	4
BP	GO:0009314	response to radiation	6/37	448/18670	0.000228307	0.00103696	0.000358292	AKT1/PTGS2/CXCL10/ICAM1/MTOR/TYR	6
BP	GO:0030168	platelet activation	4/37	153/18670	0.00023202	0.00105191	0.000363456	F2/NOS3/CD40LG/IL6	4
BP	GO:0015980	energy derivation by oxidation of organic compounds	5/37	286/18670	0.000237629	0.00107538	0.000371565	AKT1/NOS2/MTOR/IFNG/IL4	5
BP	GO:0034113	heterotypic cell-cell adhesion	3/37	61/18670	0.000238235	0.00107617	0.000371837	IL1B/IL10/TNF	3
BP	GO:0010623	programmed cell death involved in cell development	2/37	12/18670	0.000249089	0.00111318	0.000384628	IL1A/IL1B	2
BP	GO:0031392	regulation of prostaglandin biosynthetic process	2/37	12/18670	0.000249089	0.00111318	0.000384628	PTGS2/IL1B	2
BP	GO:0048302	regulation of isotype switching to IgG isotypes	2/37	12/18670	0.000249089	0.00111318	0.000384628	IL2/IL4	2
BP	GO:0048484	enteric nervous system development	2/37	12/18670	0.000249089	0.00111318	0.000384628	EDNRA/RET	2
BP	GO:0051549	positive regulation of keratinocyte migration	2/37	12/18670	0.000249089	0.00111318	0.000384628	MTOR/MMP9	2
BP	GO:0030856	regulation of epithelial cell differentiation	4/37	156/18670	0.000249892	0.00111318	0.000384628	IL1B/MMP9/IFNG/TNF	4
BP	GO:0043535	regulation of blood vessel endothelial cell migration	4/37	156/18670	0.000249892	0.00111318	0.000384628	AKT1/NOS3/PTGS2/PPARG	4
BP	GO:0046824	positive regulation of nucleocytoplasmic transport	3/37	62/18670	0.000250008	0.00111318	0.000384628	PTGS2/IL1B/IFNG	3
BP	GO:0071356	cellular response to tumor necrosis factor	5/37	291/18670	0.000257449	0.00114427	0.000395368	AKT1/CD40LG/CXCL8/ICAM1/TNF	5
BP	GO:0046686	response to cadmium ion	3/37	63/18670	0.000262151	0.00116102	0.000401156	AKT1/NCF1/MMP9	3
BP	GO:1904377	positive regulation of protein localization to cell periphery	3/37	63/18670	0.000262151	0.00116102	0.000401156	AKT1/IFNG/TNF	3
BP	GO:0051346	negative regulation of hydrolase activity	6/37	463/18670	0.000272565	0.001205	0.000416351	AKT1/NOS3/NOS1/PTGS2/MMP9/TNF	6
BP	GO:0048511	rhythmic process	5/37	295/18670	0.000274192	0.00120786	0.000417342	NOS3/NOS2/MTOR/PPARG/HNF4A	5
BP	GO:0045600	positive regulation of fat cell differentiation	3/37	64/18670	0.000274669	0.00120786	0.000417342	AKT1/PTGS2/PPARG	3
BP	GO:0060135	maternal process involved in female pregnancy	3/37	64/18670	0.000274669	0.00120786	0.000417342	AKT1/PTGS2/MTOR	3
BP	GO:0032680	regulation of tumor necrosis factor production	4/37	160/18670	0.000275236	0.00120822	0.000417465	TLR9/IFNG/IL10/IL4	4
BP	GO:0002548	monocyte chemotaxis	3/37	65/18670	0.000287567	0.00126013	0.000435401	CALCA/CXCL10/IL6	3
BP	GO:0010745	negative regulation of macrophage derived foam cell differentiation	2/37	13/18670	0.00029401	0.00126607	0.000437454	CRP/PPARG	2
BP	GO:0014745	negative regulation of muscle adaptation	2/37	13/18670	0.00029401	0.00126607	0.000437454	NOS3/MTOR	2
BP	GO:0032725	positive regulation of granulocyte macrophage colony-stimulating factor production	2/37	13/18670	0.00029401	0.00126607	0.000437454	TLR9/IL1B	2
BP	GO:0035745	T-helper 2 cell cytokine production	2/37	13/18670	0.00029401	0.00126607	0.000437454	IL6/IL4	2
BP	GO:0045779	negative regulation of bone resorption	2/37	13/18670	0.00029401	0.00126607	0.000437454	CALCA/IL6	2
BP	GO:0048291	isotype switching to IgG isotypes	2/37	13/18670	0.00029401	0.00126607	0.000437454	IL2/IL4	2
BP	GO:1901550	regulation of endothelial cell development	2/37	13/18670	0.00029401	0.00126607	0.000437454	IL1B/TNF	2
BP	GO:1902947	regulation of tau-protein kinase activity	2/37	13/18670	0.00029401	0.00126607	0.000437454	C5AR1/IFNG	2
BP	GO:1903140	regulation of establishment of endothelial barrier	2/37	13/18670	0.00029401	0.00126607	0.000437454	IL1B/TNF	2
BP	GO:1903960	negative regulation of anion transmembrane transport	2/37	13/18670	0.00029401	0.00126607	0.000437454	AKT1/MTOR	2
BP	GO:0032640	tumor necrosis factor production	4/37	163/18670	0.00029542	0.00126776	0.000438037	TLR9/IFNG/IL10/IL4	4
BP	GO:1903555	regulation of tumor necrosis factor superfamily cytokine production	4/37	163/18670	0.00029542	0.00126776	0.000438037	TLR9/IFNG/IL10/IL4	4
BP	GO:0070372	regulation of ERK1 and ERK2 cascade	5/37	300/18670	0.000296273	0.00126923	0.000438545	C5AR1/PLA2G2A/IL1B/ICAM1/TNF	5
BP	GO:1903706	regulation of hemopoiesis	6/37	475/18670	0.000312629	0.001337	0.000461961	TLR9/MTOR/IFNG/IL2/IL4/TNF	6
BP	GO:0048662	negative regulation of smooth muscle cell proliferation	3/37	67/18670	0.000314524	0.0013428	0.000463963	IFNG/IL10/PPARG	3
BP	GO:0031343	positive regulation of cell killing	3/37	68/18670	0.000328593	0.00140046	0.000483886	NOS2/PRF1/IFNG	3
BP	GO:0071706	tumor necrosis factor superfamily cytokine production	4/37	168/18670	0.000331394	0.00140998	0.000487177	TLR9/IFNG/IL10/IL4	4
BP	GO:0030307	positive regulation of cell growth	4/37	169/18670	0.000338949	0.00143721	0.000496586	AKT1/F2/MTOR/IL2	4
BP	GO:0045619	regulation of lymphocyte differentiation	4/37	169/18670	0.000338949	0.00143721	0.000496586	TLR9/IFNG/IL2/IL4	4
BP	GO:0032310	prostaglandin secretion	2/37	14/18670	0.000342583	0.00143993	0.000497525	NOS2/IL1B	2
BP	GO:0045591	positive regulation of regulatory T cell differentiation	2/37	14/18670	0.000342583	0.00143993	0.000497525	IFNG/IL2	2
BP	GO:0051547	regulation of keratinocyte migration	2/37	14/18670	0.000342583	0.00143993	0.000497525	MTOR/MMP9	2
BP	GO:2001279	regulation of unsaturated fatty acid biosynthetic process	2/37	14/18670	0.000342583	0.00143993	0.000497525	PTGS2/IL1B	2
BP	GO:0015909	long-chain fatty acid transport	3/37	69/18670	0.000343061	0.00143993	0.000497525	AKT1/PLA2G2A/PPARG	3
BP	GO:0070227	lymphocyte apoptotic process	3/37	69/18670	0.000343061	0.00143993	0.000497525	AKT1/IL2/IL10	3
BP	GO:0016049	cell growth	6/37	484/18670	0.000345613	0.0014482	0.000500383	AKT1/F2/MTOR/IL2/PPARG/HNF4A	6
BP	GO:0070371	ERK1 and ERK2 cascade	5/37	317/18670	0.000381595	0.00159629	0.00055155	C5AR1/PLA2G2A/IL1B/ICAM1/TNF	5
BP	GO:0006956	complement activation	4/37	175/18670	0.000386899	0.00161305	0.000557342	F2/C5AR1/CRP/IL1B	4
BP	GO:0046165	alcohol biosynthetic process	4/37	175/18670	0.000386899	0.00161305	0.000557342	CFTR/IL1B/IFNG/TNF	4
BP	GO:0015711	organic anion transport	6/37	495/18670	0.000389581	0.00162152	0.000560267	AKT1/PLA2G2A/CFTR/NOS2/IL1B/PPARG	6
BP	GO:0017014	protein nitrosylation	2/37	15/18670	0.000394795	0.00162959	0.000563058	NOS1/NOS2	2
BP	GO:0018119	peptidyl-cysteine S-nitrosylation	2/37	15/18670	0.000394795	0.00162959	0.000563058	NOS1/NOS2	2
BP	GO:0032645	regulation of granulocyte macrophage colony-stimulating factor production	2/37	15/18670	0.000394795	0.00162959	0.000563058	TLR9/IL1B	2
BP	GO:0046851	negative regulation of bone remodeling	2/37	15/18670	0.000394795	0.00162959	0.000563058	CALCA/IL6	2
BP	GO:0051770	positive regulation of nitric-oxide synthase biosynthetic process	2/37	15/18670	0.000394795	0.00162959	0.000563058	TLR9/IFNG	2
BP	GO:0001959	regulation of cytokine-mediated signaling pathway	4/37	177/18670	0.000403909	0.00165536	0.000571961	IFNG/IL6/PPARG/TNF	4
BP	GO:0048469	cell maturation	4/37	177/18670	0.000403909	0.00165536	0.000571961	CFTR/MTOR/RET/PPARG	4
BP	GO:0007568	aging	5/37	321/18670	0.000404128	0.00165536	0.000571961	AKT1/PTGS2/ICAM1/MTOR/IL10	5
BP	GO:0031100	animal organ regeneration	3/37	73/18670	0.000405028	0.00165536	0.000571961	C5AR1/IL10/PPARG	3
BP	GO:0061844	antimicrobial humoral immune response mediated by antimicrobial peptide	3/37	73/18670	0.000405028	0.00165536	0.000571961	F2/CXCL10/CXCL8	3
BP	GO:1903524	positive regulation of blood circulation	3/37	73/18670	0.000405028	0.00165536	0.000571961	AKT1/PTGS2/ICAM1	3
BP	GO:1903034	regulation of response to wounding	4/37	179/18670	0.000421447	0.00171451	0.000592399	F2/NOS3/MTOR/IL10	4
BP	GO:0009064	glutamine family amino acid metabolic process	3/37	74/18670	0.000421567	0.00171451	0.000592399	NOS3/NOS1/NOS2	3
BP	GO:0043507	positive regulation of JUN kinase activity	3/37	74/18670	0.000421567	0.00171451	0.000592399	CD40LG/TLR9/TNF	3
BP	GO:0043534	blood vessel endothelial cell migration	4/37	180/18670	0.000430418	0.0017448	0.000602865	AKT1/NOS3/PTGS2/PPARG	4
BP	GO:0071346	cellular response to interferon-gamma	4/37	180/18670	0.000430418	0.0017448	0.000602865	NOS2/ICAM1/IFNG/PPARG	4
BP	GO:0048015	phosphatidylinositol-mediated signaling	4/37	181/18670	0.000439524	0.00177882	0.000614619	AKT1/F2/NCF1/TNF	4
BP	GO:0010506	regulation of autophagy	5/37	328/18670	0.000445969	0.00180198	0.00062262	AKT1/MTOR/IFNG/IL10/IL4	5
BP	GO:0061138	morphogenesis of a branching epithelium	4/37	182/18670	0.000448767	0.00180325	0.00062306	EDNRA/TGM2/IL10/TNF	4
BP	GO:0002295	T-helper cell lineage commitment	2/37	16/18670	0.000450631	0.00180325	0.00062306	MTOR/IL6	2
BP	GO:0032604	granulocyte macrophage colony-stimulating factor production	2/37	16/18670	0.000450631	0.00180325	0.00062306	TLR9/IL1B	2
BP	GO:0071380	cellular response to prostaglandin E stimulus	2/37	16/18670	0.000450631	0.00180325	0.00062306	AKT1/PPARG	2
BP	GO:0090335	regulation of brown fat cell differentiation	2/37	16/18670	0.000450631	0.00180325	0.00062306	PTGS2/MTOR	2
BP	GO:1902004	positive regulation of amyloid-beta formation	2/37	16/18670	0.000450631	0.00180325	0.00062306	IFNG/TNF	2
BP	GO:0038061	NIK/NF-kappaB signaling	4/37	183/18670	0.000458149	0.00183039	0.000632436	AKT1/TLR9/IL1B/TNF	4
BP	GO:0008202	steroid metabolic process	5/37	331/18670	0.000464872	0.0018513	0.000639663	CFTR/IL1B/IFNG/IL4/TNF	5
BP	GO:0046942	carboxylic acid transport	5/37	331/18670	0.000464872	0.0018513	0.000639663	AKT1/PLA2G2A/NOS2/IL1B/PPARG	5
BP	GO:0048017	inositol lipid-mediated signaling	4/37	184/18670	0.000467669	0.00185947	0.000642485	AKT1/F2/NCF1/TNF	4
BP	GO:1901224	positive regulation of NIK/NF-kappaB signaling	3/37	77/18670	0.000473774	0.00188074	0.000649833	TLR9/IL1B/TNF	3
BP	GO:1903708	positive regulation of hemopoiesis	4/37	185/18670	0.000477331	0.00188771	0.000652242	IFNG/IL2/IL4/TNF	4
BP	GO:0015849	organic acid transport	5/37	333/18670	0.000477805	0.00188771	0.000652242	AKT1/PLA2G2A/NOS2/IL1B/PPARG	5
BP	GO:0016042	lipid catabolic process	5/37	333/18670	0.000477805	0.00188771	0.000652242	AKT1/PLA2G2A/IL1B/MTOR/TNF	5
BP	GO:0031016	pancreas development	3/37	78/18670	0.000492054	0.00194092	0.000670628	AKT1/IL6/HNF4A	3
BP	GO:0007596	blood coagulation	5/37	336/18670	0.000497714	0.00196014	0.000677269	F2/NOS3/CD40LG/IL6/HNF4A	5
BP	GO:0071248	cellular response to metal ion	4/37	188/18670	0.000507169	0.00198646	0.000686362	AKT1/PTGS2/NCF1/MMP9	4
BP	GO:0015732	prostaglandin transport	2/37	17/18670	0.000510078	0.00198646	0.000686362	NOS2/IL1B	2
BP	GO:0032740	positive regulation of interleukin-17 production	2/37	17/18670	0.000510078	0.00198646	0.000686362	IL2/IL6	2
BP	GO:0032966	negative regulation of collagen biosynthetic process	2/37	17/18670	0.000510078	0.00198646	0.000686362	IL6/PPARG	2
BP	GO:0043373	CD4-positive, alpha-beta T cell lineage commitment	2/37	17/18670	0.000510078	0.00198646	0.000686362	MTOR/IL6	2
BP	GO:1904996	positive regulation of leukocyte adhesion to vascular endothelial cell	2/37	17/18670	0.000510078	0.00198646	0.000686362	ICAM1/TNF	2
BP	GO:0043536	positive regulation of blood vessel endothelial cell migration	3/37	79/18670	0.000510781	0.00198646	0.000686362	AKT1/NOS3/PTGS2	3
BP	GO:0071260	cellular response to mechanical stimulus	3/37	79/18670	0.000510781	0.00198646	0.000686362	AKT1/PTGS2/IL1B	3
BP	GO:0060759	regulation of response to cytokine stimulus	4/37	190/18670	0.000527786	0.00204939	0.000708107	IFNG/IL6/PPARG/TNF	4
BP	GO:0007599	hemostasis	5/37	341/18670	0.00053228	0.00206362	0.000713022	F2/NOS3/CD40LG/IL6/HNF4A	5
BP	GO:0051054	positive regulation of DNA metabolic process	4/37	191/18670	0.000538316	0.00208378	0.000719987	AKT1/IL2/IL6/IL4	4
BP	GO:0050817	coagulation	5/37	342/18670	0.000539405	0.00208475	0.000720323	F2/NOS3/CD40LG/IL6/HNF4A	5
BP	GO:0006164	purine nucleotide biosynthetic process	4/37	192/18670	0.000548994	0.00211428	0.000730526	NOS3/NOS1/NOS2/IL4	4
BP	GO:0022617	extracellular matrix disassembly	3/37	81/18670	0.000549594	0.00211428	0.000730526	PRSS1/MMP9/IL6	3
BP	GO:1902930	regulation of alcohol biosynthetic process	3/37	81/18670	0.000549594	0.00211428	0.000730526	IL1B/IFNG/TNF	3
BP	GO:1901654	response to ketone	4/37	193/18670	0.000559823	0.00215031	0.000742975	AKT1/CFTR/ICAM1/PPARG	4
BP	GO:0051279	regulation of release of sequestered calcium ion into cytosol	3/37	82/18670	0.000569688	0.00218453	0.000754801	F2/NOS1/CXCL10	3
BP	GO:0002902	regulation of B cell apoptotic process	2/37	18/18670	0.000573122	0.00218453	0.000754801	IL2/IL10	2
BP	GO:0007252	I-kappaB phosphorylation	2/37	18/18670	0.000573122	0.00218453	0.000754801	AKT1/TLR9	2
BP	GO:0010713	negative regulation of collagen metabolic process	2/37	18/18670	0.000573122	0.00218453	0.000754801	IL6/PPARG	2
BP	GO:0031998	regulation of fatty acid beta-oxidation	2/37	18/18670	0.000573122	0.00218453	0.000754801	AKT1/MTOR	2
BP	GO:0006520	cellular amino acid metabolic process	5/37	348/18670	0.000583678	0.00222137	0.000767528	NOS3/NOS1/NOS2/TYR/HNF4A	5
BP	GO:0045582	positive regulation of T cell differentiation	3/37	83/18670	0.000590247	0.00224294	0.000774981	IFNG/IL2/IL4	3
BP	GO:0001763	morphogenesis of a branching structure	4/37	196/18670	0.000593222	0.00224738	0.000776515	EDNRA/TGM2/IL10/TNF	4
BP	GO:0006694	steroid biosynthetic process	4/37	196/18670	0.000593222	0.00224738	0.000776515	CFTR/IL1B/IFNG/TNF	4
BP	GO:0010507	negative regulation of autophagy	3/37	84/18670	0.000611275	0.00230875	0.000797719	AKT1/MTOR/IL10	3
BP	GO:0043154	negative regulation of cysteine-type endopeptidase activity involved in apoptotic process	3/37	84/18670	0.000611275	0.00230875	0.000797719	AKT1/PTGS2/MMP9	3
BP	GO:0034341	response to interferon-gamma	4/37	199/18670	0.000628015	0.00236479	0.000817084	NOS2/ICAM1/IFNG/PPARG	4
BP	GO:0050866	negative regulation of cell activation	4/37	199/18670	0.000628015	0.00236479	0.000817084	F2/NOS3/IL2/IL10	4
BP	GO:0002028	regulation of sodium ion transport	3/37	85/18670	0.000632777	0.00237913	0.000822037	AKT1/NOS3/NOS1	3
BP	GO:0002363	alpha-beta T cell lineage commitment	2/37	19/18670	0.000639749	0.00238017	0.000822398	MTOR/IL6	2
BP	GO:0002544	chronic inflammatory response	2/37	19/18670	0.000639749	0.00238017	0.000822398	IL10/TNF	2
BP	GO:0002726	positive regulation of T cell cytokine production	2/37	19/18670	0.000639749	0.00238017	0.000822398	IL1B/IL6	2
BP	GO:0002922	positive regulation of humoral immune response	2/37	19/18670	0.000639749	0.00238017	0.000822398	IL1B/TNF	2
BP	GO:0010544	negative regulation of platelet activation	2/37	19/18670	0.000639749	0.00238017	0.000822398	F2/NOS3	2
BP	GO:0051546	keratinocyte migration	2/37	19/18670	0.000639749	0.00238017	0.000822398	MTOR/MMP9	2
BP	GO:2000010	positive regulation of protein localization to cell surface	2/37	19/18670	0.000639749	0.00238017	0.000822398	AKT1/TNF	2
BP	GO:0001776	leukocyte homeostasis	3/37	86/18670	0.000654757	0.00241794	0.000835446	AKT1/IL2/IL6	3
BP	GO:0008625	extrinsic apoptotic signaling pathway via death domain receptors	3/37	86/18670	0.000654757	0.00241794	0.000835446	NOS3/ICAM1/TNF	3
BP	GO:0042058	regulation of epidermal growth factor receptor signaling pathway	3/37	86/18670	0.000654757	0.00241794	0.000835446	AKT1/NCF1/MMP9	3
BP	GO:0042446	hormone biosynthetic process	3/37	86/18670	0.000654757	0.00241794	0.000835446	IL1B/IFNG/TNF	3
BP	GO:0070542	response to fatty acid	3/37	86/18670	0.000654757	0.00241794	0.000835446	AKT1/PTGS2/PPARG	3
BP	GO:0045861	negative regulation of proteolysis	5/37	358/18670	0.000663484	0.00244207	0.000843785	AKT1/F2/PTGS2/MMP9/IL10	5
BP	GO:0045862	positive regulation of proteolysis	5/37	358/18670	0.000663484	0.00244207	0.000843785	AKT1/IL1B/IFNG/PPARG/TNF	5
BP	GO:0009746	response to hexose	4/37	202/18670	0.000664235	0.00244207	0.000843785	CFTR/PTGS2/ICAM1/HNF4A	4
BP	GO:0014068	positive regulation of phosphatidylinositol 3-kinase signaling	3/37	87/18670	0.000677218	0.00248613	0.000859008	F2/NCF1/TNF	3
BP	GO:0034103	regulation of tissue remodeling	3/37	88/18670	0.000700166	0.00255905	0.000884204	CALCA/IL2/IL6	3
BP	GO:0043506	regulation of JUN kinase activity	3/37	88/18670	0.000700166	0.00255905	0.000884204	CD40LG/TLR9/TNF	3
BP	GO:1900407	regulation of cellular response to oxidative stress	3/37	88/18670	0.000700166	0.00255905	0.000884204	AKT1/IL10/TNF	3
BP	GO:0072522	purine-containing compound biosynthetic process	4/37	205/18670	0.000701916	0.00256095	0.00088486	NOS3/NOS1/NOS2/IL4	4
BP	GO:0006936	muscle contraction	5/37	363/18670	0.000706335	0.00256095	0.00088486	EDNRA/MB/NOS1/PTGS2/MTOR	5
BP	GO:0002374	cytokine secretion involved in immune response	2/37	20/18670	0.000709946	0.00256095	0.00088486	IL10/TNF	2
BP	GO:0034104	negative regulation of tissue remodeling	2/37	20/18670	0.000709946	0.00256095	0.00088486	CALCA/IL6	2
BP	GO:0034393	positive regulation of smooth muscle cell apoptotic process	2/37	20/18670	0.000709946	0.00256095	0.00088486	IFNG/PPARG	2
BP	GO:0043369	CD4-positive or CD8-positive, alpha-beta T cell lineage commitment	2/37	20/18670	0.000709946	0.00256095	0.00088486	MTOR/IL6	2
BP	GO:0051767	nitric-oxide synthase biosynthetic process	2/37	20/18670	0.000709946	0.00256095	0.00088486	TLR9/IFNG	2
BP	GO:0051769	regulation of nitric-oxide synthase biosynthetic process	2/37	20/18670	0.000709946	0.00256095	0.00088486	TLR9/IFNG	2
BP	GO:1902993	positive regulation of amyloid precursor protein catabolic process	2/37	20/18670	0.000709946	0.00256095	0.00088486	IFNG/TNF	2
BP	GO:0050679	positive regulation of epithelial cell proliferation	4/37	206/18670	0.000714806	0.00257475	0.000889629	AKT1/C5AR1/MTOR/IL10	4
BP	GO:0097306	cellular response to alcohol	3/37	89/18670	0.000723605	0.00260268	0.000899278	AKT1/CFTR/PPARG	3
BP	GO:0002064	epithelial cell development	4/37	207/18670	0.000727864	0.0026067	0.000900666	IL1B/ICAM1/HNF4A/TNF	4
BP	GO:0034284	response to monosaccharide	4/37	207/18670	0.000727864	0.0026067	0.000900666	CFTR/PTGS2/ICAM1/HNF4A	4
BP	GO:0071456	cellular response to hypoxia	4/37	207/18670	0.000727864	0.0026067	0.000900666	AKT1/PTGS2/ICAM1/MTOR	4
BP	GO:0007623	circadian rhythm	4/37	208/18670	0.00074109	0.00265025	0.000915715	NOS2/MTOR/PPARG/HNF4A	4
BP	GO:0010717	regulation of epithelial to mesenchymal transition	3/37	90/18670	0.000747539	0.00266948	0.000922358	IL1B/MTOR/IL6	3
BP	GO:0030198	extracellular matrix organization	5/37	368/18670	0.000751232	0.00267882	0.000925586	ICAM1/PRSS1/MMP9/IL6/TNF	5
BP	GO:0043062	extracellular structure organization	5/37	369/18670	0.000760462	0.00270785	0.000935619	ICAM1/PRSS1/MMP9/IL6/TNF	5
BP	GO:0006066	alcohol metabolic process	5/37	370/18670	0.000769777	0.00273711	0.000945726	CFTR/IL1B/IFNG/IL4/TNF	5
BP	GO:0060333	interferon-gamma-mediated signaling pathway	3/37	91/18670	0.000771972	0.002741	0.00094707	ICAM1/IFNG/PPARG	3
BP	GO:0010829	negative regulation of glucose transmembrane transport	2/37	21/18670	0.000783698	0.00276684	0.000956	IL1B/TNF	2
BP	GO:0030728	ovulation	2/37	21/18670	0.000783698	0.00276684	0.000956	NOS3/PTGS2	2
BP	GO:0032682	negative regulation of chemokine production	2/37	21/18670	0.000783698	0.00276684	0.000956	IL10/IL6	2
BP	GO:0033141	positive regulation of peptidyl-serine phosphorylation of STAT protein	2/37	21/18670	0.000783698	0.00276684	0.000956	IFNG/RET	2
BP	GO:0045833	negative regulation of lipid metabolic process	3/37	92/18670	0.000796908	0.00280552	0.000969365	AKT1/IL1B/TNF	3
BP	GO:2000117	negative regulation of cysteine-type endopeptidase activity	3/37	92/18670	0.000796908	0.00280552	0.000969365	AKT1/PTGS2/MMP9	3
BP	GO:0051098	regulation of binding	5/37	373/18670	0.000798237	0.00280623	0.00096961	AKT1/MMP9/IFNG/IL10/PPARG	5
BP	GO:1901184	regulation of ERBB signaling pathway	3/37	93/18670	0.000822352	0.00288693	0.000997493	AKT1/NCF1/MMP9	3
BP	GO:0045732	positive regulation of protein catabolic process	4/37	214/18670	0.000824049	0.00288881	0.000998144	AKT1/IL1B/IFNG/TNF	4
BP	GO:0070374	positive regulation of ERK1 and ERK2 cascade	4/37	215/18670	0.000838487	0.00293117	0.00101278	C5AR1/PLA2G2A/ICAM1/TNF	4
BP	GO:0071241	cellular response to inorganic substance	4/37	215/18670	0.000838487	0.00293117	0.00101278	AKT1/PTGS2/NCF1/MMP9	4
BP	GO:0045621	positive regulation of lymphocyte differentiation	3/37	94/18670	0.000848307	0.00295719	0.00102177	IFNG/IL2/IL4	3
BP	GO:1901216	positive regulation of neuron death	3/37	94/18670	0.000848307	0.00295719	0.00102177	MTOR/IFNG/TNF	3
BP	GO:0010869	regulation of receptor biosynthetic process	2/37	22/18670	0.000860993	0.00298469	0.00103127	IFNG/PPARG	2
BP	GO:0045723	positive regulation of fatty acid biosynthetic process	2/37	22/18670	0.000860993	0.00298469	0.00103127	PTGS2/IL1B	2
BP	GO:0051000	positive regulation of nitric-oxide synthase activity	2/37	22/18670	0.000860993	0.00298469	0.00103127	AKT1/TNF	2
BP	GO:0071379	cellular response to prostaglandin stimulus	2/37	22/18670	0.000860993	0.00298469	0.00103127	AKT1/PPARG	2
BP	GO:0036294	cellular response to decreased oxygen levels	4/37	217/18670	0.0008679	0.00300028	0.00103666	AKT1/PTGS2/ICAM1/MTOR	4
BP	GO:0050920	regulation of chemotaxis	4/37	217/18670	0.0008679	0.00300028	0.00103666	C5AR1/CXCL10/CXCL8/IL6	4
BP	GO:0050810	regulation of steroid biosynthetic process	3/37	95/18670	0.000874778	0.00301568	0.00104198	IL1B/IFNG/TNF	3
BP	GO:1903076	regulation of protein localization to plasma membrane	3/37	95/18670	0.000874778	0.00301568	0.00104198	AKT1/IFNG/TNF	3
BP	GO:0019722	calcium-mediated signaling	4/37	218/18670	0.000882877	0.00303939	0.00105017	NOS1/CXCL8/MTOR/TNF	4
BP	GO:0006631	fatty acid metabolic process	5/37	383/18670	0.000898825	0.00309002	0.00106767	AKT1/PTGS2/IL1B/MTOR/PPARG	5
BP	GO:0007188	adenylate cyclase-modulating G protein-coupled receptor signaling pathway	4/37	221/18670	0.000928902	0.00318593	0.0011008	CALCA/EDNRA/NOS1/CXCL10	4
BP	GO:1902882	regulation of response to oxidative stress	3/37	97/18670	0.000929284	0.00318593	0.0011008	AKT1/IL10/TNF	3
BP	GO:0032717	negative regulation of interleukin-8 production	2/37	23/18670	0.000941816	0.00320243	0.00110651	TLR9/IL10	2
BP	GO:0033139	regulation of peptidyl-serine phosphorylation of STAT protein	2/37	23/18670	0.000941816	0.00320243	0.00110651	IFNG/RET	2
BP	GO:0034695	response to prostaglandin E	2/37	23/18670	0.000941816	0.00320243	0.00110651	AKT1/PPARG	2
BP	GO:0048714	positive regulation of oligodendrocyte differentiation	2/37	23/18670	0.000941816	0.00320243	0.00110651	MTOR/PPARG	2
BP	GO:0060445	branching involved in salivary gland morphogenesis	2/37	23/18670	0.000941816	0.00320243	0.00110651	TGM2/TNF	2
BP	GO:1903429	regulation of cell maturation	2/37	23/18670	0.000941816	0.00320243	0.00110651	MTOR/RET	2
BP	GO:0050848	regulation of calcium-mediated signaling	3/37	98/18670	0.000957326	0.0032463	0.00112166	NOS1/MTOR/TNF	3
BP	GO:2001243	negative regulation of intrinsic apoptotic signaling pathway	3/37	98/18670	0.000957326	0.0032463	0.00112166	AKT1/PTGS2/MMP9	3
BP	GO:0019395	fatty acid oxidation	3/37	99/18670	0.0009859	0.00333865	0.00115357	AKT1/MTOR/PPARG	3
BP	GO:0070498	interleukin-1-mediated signaling pathway	3/37	100/18670	0.00101501	0.00343256	0.00118602	IL1A/IL1B/IL6	3
BP	GO:0001783	B cell apoptotic process	2/37	24/18670	0.00102615	0.00345149	0.00119256	IL2/IL10	2
BP	GO:0002861	regulation of inflammatory response to antigenic stimulus	2/37	24/18670	0.00102615	0.00345149	0.00119256	IL10/TNF	2
BP	GO:0071677	positive regulation of mononuclear cell migration	2/37	24/18670	0.00102615	0.00345149	0.00119256	CXCL10/TNF	2
BP	GO:0090023	positive regulation of neutrophil chemotaxis	2/37	24/18670	0.00102615	0.00345149	0.00119256	C5AR1/CXCL8	2
BP	GO:0000018	regulation of DNA recombination	3/37	101/18670	0.00104466	0.00350426	0.00121079	IL2/IL10/IL4	3
BP	GO:0034440	lipid oxidation	3/37	101/18670	0.00104466	0.00350426	0.00121079	AKT1/MTOR/PPARG	3
BP	GO:0010594	regulation of endothelial cell migration	4/37	229/18670	0.00105989	0.00355056	0.00122679	AKT1/NOS3/PTGS2/PPARG	4
BP	GO:0010522	regulation of calcium ion transport into cytosol	3/37	102/18670	0.00107485	0.00359585	0.00124244	F2/NOS1/CXCL10	3
BP	GO:0071695	anatomical structure maturation	4/37	232/18670	0.0011122	0.00368715	0.00127398	CFTR/MTOR/RET/PPARG	4
BP	GO:0002719	negative regulation of cytokine production involved in immune response	2/37	25/18670	0.001114	0.00368715	0.00127398	IL10/TNF	2
BP	GO:0019430	removal of superoxide radicals	2/37	25/18670	0.001114	0.00368715	0.00127398	NOS3/TNF	2
BP	GO:0045662	negative regulation of myoblast differentiation	2/37	25/18670	0.001114	0.00368715	0.00127398	CXCL10/TNF	2
BP	GO:0045672	positive regulation of osteoclast differentiation	2/37	25/18670	0.001114	0.00368715	0.00127398	IFNG/TNF	2
BP	GO:0045830	positive regulation of isotype switching	2/37	25/18670	0.001114	0.00368715	0.00127398	IL2/IL4	2
BP	GO:0060330	regulation of response to interferon-gamma	2/37	25/18670	0.001114	0.00368715	0.00127398	IFNG/PPARG	2
BP	GO:0060334	regulation of interferon-gamma-mediated signaling pathway	2/37	25/18670	0.001114	0.00368715	0.00127398	IFNG/PPARG	2
BP	GO:0019233	sensory perception of pain	3/37	104/18670	0.00113689	0.00375293	0.00129671	PTGS2/MTOR/IL10	3
BP	GO:0046822	regulation of nucleocytoplasmic transport	3/37	104/18670	0.00113689	0.00375293	0.00129671	PTGS2/IL1B/IFNG	3
BP	GO:1901606	alpha-amino acid catabolic process	3/37	106/18670	0.00120114	0.00395264	0.00136572	NOS3/NOS1/NOS2	3
BP	GO:0002360	T cell lineage commitment	2/37	26/18670	0.00120532	0.00395264	0.00136572	MTOR/IL6	2
BP	GO:0071624	positive regulation of granulocyte chemotaxis	2/37	26/18670	0.00120532	0.00395264	0.00136572	C5AR1/CXCL8	2
BP	GO:0072539	T-helper 17 cell differentiation	2/37	26/18670	0.00120532	0.00395264	0.00136572	IL2/IL6	2
BP	GO:1900120	regulation of receptor binding	2/37	26/18670	0.00120532	0.00395264	0.00136572	MMP9/IL10	2
BP	GO:0002026	regulation of the force of heart contraction	2/37	27/18670	0.00130013	0.00423562	0.00146349	NOS3/NOS1	2
BP	GO:0042501	serine phosphorylation of STAT protein	2/37	27/18670	0.00130013	0.00423562	0.00146349	IFNG/RET	2
BP	GO:0071450	cellular response to oxygen radical	2/37	27/18670	0.00130013	0.00423562	0.00146349	NOS3/TNF	2
BP	GO:0071451	cellular response to superoxide	2/37	27/18670	0.00130013	0.00423562	0.00146349	NOS3/TNF	2
BP	GO:2000191	regulation of fatty acid transport	2/37	27/18670	0.00130013	0.00423562	0.00146349	AKT1/IL1B	2
BP	GO:0031334	positive regulation of protein-containing complex assembly	4/37	244/18670	0.00133968	0.0043531	0.00150408	ICAM1/MTOR/IFNG/TNF	4
BP	GO:0051896	regulation of protein kinase B signaling	4/37	244/18670	0.00133968	0.0043531	0.00150408	AKT1/MTOR/RET/TNF	4
BP	GO:0001516	prostaglandin biosynthetic process	2/37	28/18670	0.00139839	0.00448531	0.00154976	PTGS2/IL1B	2
BP	GO:0001773	myeloid dendritic cell activation	2/37	28/18670	0.00139839	0.00448531	0.00154976	IL10/IL4	2
BP	GO:0032647	regulation of interferon-alpha production	2/37	28/18670	0.00139839	0.00448531	0.00154976	TLR9/IL10	2
BP	GO:0034368	protein-lipid complex remodeling	2/37	28/18670	0.00139839	0.00448531	0.00154976	ALB/PLA2G2A	2
BP	GO:0034369	plasma lipoprotein particle remodeling	2/37	28/18670	0.00139839	0.00448531	0.00154976	ALB/PLA2G2A	2
BP	GO:0045745	positive regulation of G protein-coupled receptor signaling pathway	2/37	28/18670	0.00139839	0.00448531	0.00154976	F2/NOS1	2
BP	GO:0046457	prostanoid biosynthetic process	2/37	28/18670	0.00139839	0.00448531	0.00154976	PTGS2/IL1B	2
BP	GO:1902003	regulation of amyloid-beta formation	2/37	28/18670	0.00139839	0.00448531	0.00154976	IFNG/TNF	2
BP	GO:1903792	negative regulation of anion transport	2/37	28/18670	0.00139839	0.00448531	0.00154976	AKT1/MTOR	2
BP	GO:1904994	regulation of leukocyte adhesion to vascular endothelial cell	2/37	28/18670	0.00139839	0.00448531	0.00154976	ICAM1/TNF	2
BP	GO:0001938	positive regulation of endothelial cell proliferation	3/37	112/18670	0.00140752	0.00449721	0.00155388	AKT1/MTOR/IL10	3
BP	GO:0014902	myotube differentiation	3/37	112/18670	0.00140752	0.00449721	0.00155388	NOS1/CXCL10/MTOR	3
BP	GO:0043279	response to alkaloid	3/37	112/18670	0.00140752	0.00449721	0.00155388	ICAM1/MTOR/PPARG	3
BP	GO:0052548	regulation of endopeptidase activity	5/37	425/18670	0.00142778	0.00455609	0.00157422	AKT1/PTGS2/MMP9/PPARG/TNF	5
BP	GO:0043200	response to amino acid	3/37	113/18670	0.00144395	0.00460177	0.00159001	ICAM1/MTOR/TNF	3
BP	GO:0042752	regulation of circadian rhythm	3/37	114/18670	0.00148096	0.00470767	0.00162659	MTOR/PPARG/HNF4A	3
BP	GO:0045446	endothelial cell differentiation	3/37	114/18670	0.00148096	0.00470767	0.00162659	IL1B/ICAM1/TNF	3
BP	GO:0045637	regulation of myeloid cell differentiation	4/37	251/18670	0.00148646	0.00471213	0.00162814	MTOR/IFNG/IL4/TNF	4
BP	GO:0001933	negative regulation of protein phosphorylation	5/37	429/18670	0.00148804	0.00471213	0.00162814	AKT1/IL1B/MTOR/IFNG/IL2	5
BP	GO:0043254	regulation of protein-containing complex assembly	5/37	429/18670	0.00148804	0.00471213	0.00162814	ALB/ICAM1/MTOR/IFNG/TNF	5
BP	GO:0000303	response to superoxide	2/37	29/18670	0.0015001	0.00471434	0.0016289	NOS3/TNF	2
BP	GO:0005979	regulation of glycogen biosynthetic process	2/37	29/18670	0.0015001	0.00471434	0.0016289	AKT1/MTOR	2
BP	GO:0010962	regulation of glucan biosynthetic process	2/37	29/18670	0.0015001	0.00471434	0.0016289	AKT1/MTOR	2
BP	GO:0034367	protein-containing complex remodeling	2/37	29/18670	0.0015001	0.00471434	0.0016289	ALB/PLA2G2A	2
BP	GO:0072538	T-helper 17 type immune response	2/37	29/18670	0.0015001	0.00471434	0.0016289	IL2/IL6	2
BP	GO:1902624	positive regulation of neutrophil migration	2/37	29/18670	0.0015001	0.00471434	0.0016289	C5AR1/CXCL8	2
BP	GO:0030449	regulation of complement activation	3/37	115/18670	0.00151856	0.00475434	0.00164272	F2/C5AR1/IL1B	3
BP	GO:0032612	interleukin-1 production	3/37	115/18670	0.00151856	0.00475434	0.00164272	IL1B/IFNG/IL10	3
BP	GO:1904375	regulation of protein localization to cell periphery	3/37	115/18670	0.00151856	0.00475434	0.00164272	AKT1/IFNG/TNF	3
BP	GO:0006163	purine nucleotide metabolic process	5/37	432/18670	0.00153446	0.00479807	0.00165783	NOS3/NOS1/NOS2/IFNG/IL4	5
BP	GO:1901222	regulation of NIK/NF-kappaB signaling	3/37	117/18670	0.00159556	0.00496949	0.00171706	TLR9/IL1B/TNF	3
BP	GO:0007187	G protein-coupled receptor signaling pathway, coupled to cyclic nucleotide second messenger	4/37	256/18670	0.00159795	0.00496949	0.00171706	CALCA/EDNRA/NOS1/CXCL10	4
BP	GO:0000305	response to oxygen radical	2/37	30/18670	0.00160525	0.00496949	0.00171706	NOS3/TNF	2
BP	GO:0032607	interferon-alpha production	2/37	30/18670	0.00160525	0.00496949	0.00171706	TLR9/IL10	2
BP	GO:0032743	positive regulation of interleukin-2 production	2/37	30/18670	0.00160525	0.00496949	0.00171706	IL1A/IL1B	2
BP	GO:0035066	positive regulation of histone acetylation	2/37	30/18670	0.00160525	0.00496949	0.00171706	NOS1/IL1B	2
BP	GO:0045948	positive regulation of translational initiation	2/37	30/18670	0.00160525	0.00496949	0.00171706	MTOR/TNF	2
BP	GO:0090022	regulation of neutrophil chemotaxis	2/37	30/18670	0.00160525	0.00496949	0.00171706	C5AR1/CXCL8	2
BP	GO:0090257	regulation of muscle system process	4/37	259/18670	0.00166758	0.00515604	0.00178152	NOS3/NOS1/PTGS2/MTOR	4
BP	GO:0007173	epidermal growth factor receptor signaling pathway	3/37	119/18670	0.00167496	0.00517243	0.00178718	AKT1/NCF1/MMP9	3
BP	GO:0002724	regulation of T cell cytokine production	2/37	31/18670	0.00171382	0.00524579	0.00181253	IL1B/IL6	2
BP	GO:0007202	activation of phospholipase C activity	2/37	31/18670	0.00171382	0.00524579	0.00181253	EDNRA/C5AR1	2
BP	GO:0010543	regulation of platelet activation	2/37	31/18670	0.00171382	0.00524579	0.00181253	F2/NOS3	2
BP	GO:0033198	response to ATP	2/37	31/18670	0.00171382	0.00524579	0.00181253	PTGS2/IL1B	2
BP	GO:0034694	response to prostaglandin	2/37	31/18670	0.00171382	0.00524579	0.00181253	AKT1/PPARG	2
BP	GO:0048710	regulation of astrocyte differentiation	2/37	31/18670	0.00171382	0.00524579	0.00181253	F2/IL6	2
BP	GO:0051482	positive regulation of cytosolic calcium ion concentration involved in phospholipase C-activating G protein-coupled signaling pathway	2/37	31/18670	0.00171382	0.00524579	0.00181253	CALCA/TGM2	2
BP	GO:0002698	negative regulation of immune effector process	3/37	120/18670	0.00171558	0.00524579	0.00181253	IL2/IL10/TNF	3
BP	GO:0034504	protein localization to nucleus	4/37	262/18670	0.0017393	0.00531179	0.00183533	AKT1/F2/PTGS2/IFNG	4
BP	GO:0044282	small molecule catabolic process	5/37	445/18670	0.00174806	0.00533201	0.00184232	AKT1/NOS3/NOS1/NOS2/MTOR	5
BP	GO:1905477	positive regulation of protein localization to membrane	3/37	122/18670	0.00179865	0.0054796	0.00189331	AKT1/IFNG/TNF	3
BP	GO:0042311	vasodilation	2/37	32/18670	0.0018258	0.00553522	0.00191253	NOS3/NOS1	2
BP	GO:0045589	regulation of regulatory T cell differentiation	2/37	32/18670	0.0018258	0.00553522	0.00191253	IFNG/IL2	2
BP	GO:0055094	response to lipoprotein particle	2/37	32/18670	0.0018258	0.00553522	0.00191253	AKT1/PPARG	2
BP	GO:1900745	positive regulation of p38MAPK cascade	2/37	32/18670	0.0018258	0.00553522	0.00191253	NCF1/IL1B	2
BP	GO:0052547	regulation of peptidase activity	5/37	452/18670	0.00187177	0.00566768	0.0019583	AKT1/PTGS2/MMP9/PPARG/TNF	5
BP	GO:0014066	regulation of phosphatidylinositol 3-kinase signaling	3/37	124/18670	0.0018842	0.00567082	0.00195938	F2/NCF1/TNF	3
BP	GO:0019218	regulation of steroid metabolic process	3/37	124/18670	0.0018842	0.00567082	0.00195938	IL1B/IFNG/TNF	3
BP	GO:0046717	acid secretion	3/37	124/18670	0.0018842	0.00567082	0.00195938	PLA2G2A/NOS2/IL1B	3
BP	GO:0051101	regulation of DNA binding	3/37	124/18670	0.0018842	0.00567082	0.00195938	MMP9/IFNG/PPARG	3
BP	GO:0051209	release of sequestered calcium ion into cytosol	3/37	124/18670	0.0018842	0.00567082	0.00195938	F2/NOS1/CXCL10	3
BP	GO:0009063	cellular amino acid catabolic process	3/37	125/18670	0.00192791	0.00578838	0.002	NOS3/NOS1/NOS2	3
BP	GO:0032368	regulation of lipid transport	3/37	125/18670	0.00192791	0.00578838	0.002	AKT1/IL1B/PPARG	3
BP	GO:0045927	positive regulation of growth	4/37	270/18670	0.00194101	0.00580021	0.00200409	AKT1/F2/MTOR/IL2	4
BP	GO:0016242	negative regulation of macroautophagy	2/37	33/18670	0.00194117	0.00580021	0.00200409	AKT1/MTOR	2
BP	GO:2000352	negative regulation of endothelial cell apoptotic process	2/37	33/18670	0.00194117	0.00580021	0.00200409	ICAM1/IL4	2
BP	GO:2000758	positive regulation of peptidyl-lysine acetylation	2/37	33/18670	0.00194117	0.00580021	0.00200409	NOS1/IL1B	2
BP	GO:0051283	negative regulation of sequestering of calcium ion	3/37	126/18670	0.00197225	0.00588601	0.00203373	F2/NOS1/CXCL10	3
BP	GO:0035270	endocrine system development	3/37	127/18670	0.00201722	0.00600582	0.00207513	AKT1/IL6/HNF4A	3
BP	GO:0045727	positive regulation of translation	3/37	127/18670	0.00201722	0.00600582	0.00207513	MTOR/IL6/TNF	3
BP	GO:0043542	endothelial cell migration	4/37	274/18670	0.00204771	0.00602628	0.0020822	AKT1/NOS3/PTGS2/PPARG	4
BP	GO:0007435	salivary gland morphogenesis	2/37	34/18670	0.00205993	0.00602628	0.0020822	TGM2/TNF	2
BP	GO:0010765	positive regulation of sodium ion transport	2/37	34/18670	0.00205993	0.00602628	0.0020822	AKT1/NOS1	2
BP	GO:0010922	positive regulation of phosphatase activity	2/37	34/18670	0.00205993	0.00602628	0.0020822	MTOR/IFNG	2
BP	GO:0032148	activation of protein kinase B activity	2/37	34/18670	0.00205993	0.00602628	0.0020822	AKT1/MTOR	2
BP	GO:0034205	amyloid-beta formation	2/37	34/18670	0.00205993	0.00602628	0.0020822	IFNG/TNF	2
BP	GO:0043276	anoikis	2/37	34/18670	0.00205993	0.00602628	0.0020822	AKT1/MTOR	2
BP	GO:0043368	positive T cell selection	2/37	34/18670	0.00205993	0.00602628	0.0020822	MTOR/IL6	2
BP	GO:0045066	regulatory T cell differentiation	2/37	34/18670	0.00205993	0.00602628	0.0020822	IFNG/IL2	2
BP	GO:0048566	embryonic digestive tract development	2/37	34/18670	0.00205993	0.00602628	0.0020822	CXCL8/TNF	2
BP	GO:0070884	regulation of calcineurin-NFAT signaling cascade	2/37	34/18670	0.00205993	0.00602628	0.0020822	MTOR/TNF	2
BP	GO:0071402	cellular response to lipoprotein particle stimulus	2/37	34/18670	0.00205993	0.00602628	0.0020822	AKT1/PPARG	2
BP	GO:0106056	regulation of calcineurin-mediated signaling	2/37	34/18670	0.00205993	0.00602628	0.0020822	MTOR/TNF	2
BP	GO:2000273	positive regulation of signaling receptor activity	2/37	34/18670	0.00205993	0.00602628	0.0020822	NCF1/IFNG	2
BP	GO:0010595	positive regulation of endothelial cell migration	3/37	128/18670	0.00206283	0.00602628	0.0020822	AKT1/NOS3/PTGS2	3
BP	GO:0051282	regulation of sequestering of calcium ion	3/37	128/18670	0.00206283	0.00602628	0.0020822	F2/NOS1/CXCL10	3
BP	GO:0072521	purine-containing compound metabolic process	5/37	464/18670	0.00209868	0.00612382	0.0021159	NOS3/NOS1/NOS2/IFNG/IL4	5
BP	GO:1903038	negative regulation of leukocyte cell-cell adhesion	3/37	129/18670	0.00210908	0.00614696	0.0021239	AKT1/IL2/IL10	3
BP	GO:0043500	muscle adaptation	3/37	130/18670	0.00215597	0.00627627	0.00216858	NOS3/IL1B/MTOR	3
BP	GO:0042326	negative regulation of phosphorylation	5/37	468/18670	0.00217862	0.00631526	0.00218205	AKT1/IL1B/MTOR/IFNG/IL2	5
BP	GO:0001893	maternal placenta development	2/37	35/18670	0.00218205	0.00631526	0.00218205	AKT1/PTGS2	2
BP	GO:0002701	negative regulation of production of molecular mediator of immune response	2/37	35/18670	0.00218205	0.00631526	0.00218205	IL10/TNF	2
BP	GO:0070873	regulation of glycogen metabolic process	2/37	35/18670	0.00218205	0.00631526	0.00218205	AKT1/MTOR	2
BP	GO:1902991	regulation of amyloid precursor protein catabolic process	2/37	35/18670	0.00218205	0.00631526	0.00218205	IFNG/TNF	2
BP	GO:0051208	sequestering of calcium ion	3/37	131/18670	0.00220351	0.00636995	0.00220095	F2/NOS1/CXCL10	3
BP	GO:0060047	heart contraction	4/37	282/18670	0.00227323	0.00656388	0.00226795	NOS3/NOS1/MTOR/IL2	4
BP	GO:0032733	positive regulation of interleukin-10 production	2/37	36/18670	0.00230753	0.00661687	0.00228626	CD40LG/TLR9	2
BP	GO:0034390	smooth muscle cell apoptotic process	2/37	36/18670	0.00230753	0.00661687	0.00228626	IFNG/PPARG	2
BP	GO:0034391	regulation of smooth muscle cell apoptotic process	2/37	36/18670	0.00230753	0.00661687	0.00228626	IFNG/PPARG	2
BP	GO:0042554	superoxide anion generation	2/37	36/18670	0.00230753	0.00661687	0.00228626	CRP/NCF1	2
BP	GO:0090322	regulation of superoxide metabolic process	2/37	36/18670	0.00230753	0.00661687	0.00228626	CRP/TNF	2
BP	GO:1902622	regulation of neutrophil migration	2/37	36/18670	0.00230753	0.00661687	0.00228626	C5AR1/CXCL8	2
BP	GO:0021700	developmental maturation	4/37	284/18670	0.00233218	0.00667986	0.00230803	CFTR/MTOR/RET/PPARG	4
BP	GO:0034248	regulation of cellular amide metabolic process	5/37	476/18670	0.00234518	0.00670936	0.00231822	AKT1/MTOR/IFNG/IL6/TNF	5
BP	GO:0048565	digestive tract development	3/37	134/18670	0.00235002	0.0067155	0.00232034	CXCL8/RET/TNF	3
BP	GO:0051348	negative regulation of transferase activity	4/37	285/18670	0.00236205	0.00674214	0.00232955	AKT1/IL1B/IFNG/PPARG	4
BP	GO:0007431	salivary gland development	2/37	37/18670	0.00243635	0.00691457	0.00238912	TGM2/TNF	2
BP	GO:0030212	hyaluronan metabolic process	2/37	37/18670	0.00243635	0.00691457	0.00238912	AKT1/IL1B	2
BP	GO:0032885	regulation of polysaccharide biosynthetic process	2/37	37/18670	0.00243635	0.00691457	0.00238912	AKT1/MTOR	2
BP	GO:0042307	positive regulation of protein import into nucleus	2/37	37/18670	0.00243635	0.00691457	0.00238912	PTGS2/IFNG	2
BP	GO:0043029	T cell homeostasis	2/37	37/18670	0.00243635	0.00691457	0.00238912	AKT1/IL2	2
BP	GO:0097193	intrinsic apoptotic signaling pathway	4/37	289/18670	0.00248418	0.00704228	0.00243325	AKT1/PTGS2/MMP9/TNF	4
BP	GO:0031644	regulation of nervous system process	3/37	137/18670	0.00250245	0.007086	0.00244836	NOS3/MTOR/IL10	3
BP	GO:0032094	response to food	2/37	38/18670	0.0025685	0.00724831	0.00250444	AKT1/MTOR	2
BP	GO:1904037	positive regulation of epithelial cell apoptotic process	2/37	38/18670	0.0025685	0.00724831	0.00250444	CD40LG/IL6	2
BP	GO:1904706	negative regulation of vascular associated smooth muscle cell proliferation	2/37	38/18670	0.0025685	0.00724831	0.00250444	IL10/PPARG	2
BP	GO:0003015	heart process	4/37	292/18670	0.00257859	0.0072521	0.00250575	NOS3/NOS1/MTOR/IL2	4
BP	GO:0006310	DNA recombination	4/37	292/18670	0.00257859	0.0072521	0.00250575	CD40LG/IL2/IL10/IL4	4
BP	GO:0009410	response to xenobiotic stimulus	4/37	292/18670	0.00257859	0.0072521	0.00250575	ICAM1/MTOR/PPARG/HNF4A	4
BP	GO:0007189	adenylate cyclase-activating G protein-coupled receptor signaling pathway	3/37	139/18670	0.0026074	0.00731659	0.00252803	CALCA/NOS1/CXCL10	3
BP	GO:0045580	regulation of T cell differentiation	3/37	139/18670	0.0026074	0.00731659	0.00252803	IFNG/IL2/IL4	3
BP	GO:0051146	striated muscle cell differentiation	4/37	293/18670	0.0026106	0.00731733	0.00252829	AKT1/NOS1/CXCL10/MTOR	4
BP	GO:0097553	calcium ion transmembrane import into cytosol	3/37	140/18670	0.00266088	0.00744986	0.00257408	F2/NOS1/CXCL10	3
BP	GO:0050768	negative regulation of neurogenesis	4/37	295/18670	0.00267545	0.00748223	0.00258526	F2/IL1B/IL6/TNF	4
BP	GO:0002251	organ or tissue specific immune response	2/37	39/18670	0.00270397	0.00750025	0.00259149	NOS2/IL6	2
BP	GO:0010661	positive regulation of muscle cell apoptotic process	2/37	39/18670	0.00270397	0.00750025	0.00259149	IFNG/PPARG	2
BP	GO:0045911	positive regulation of DNA recombination	2/37	39/18670	0.00270397	0.00750025	0.00259149	IL2/IL4	2
BP	GO:0048713	regulation of oligodendrocyte differentiation	2/37	39/18670	0.00270397	0.00750025	0.00259149	MTOR/PPARG	2
BP	GO:0051930	regulation of sensory perception of pain	2/37	39/18670	0.00270397	0.00750025	0.00259149	MTOR/IL10	2
BP	GO:1902042	negative regulation of extrinsic apoptotic signaling pathway via death domain receptors	2/37	39/18670	0.00270397	0.00750025	0.00259149	NOS3/ICAM1	2
BP	GO:1904591	positive regulation of protein import	2/37	39/18670	0.00270397	0.00750025	0.00259149	PTGS2/IFNG	2
BP	GO:0050890	cognition	4/37	296/18670	0.00270828	0.00750025	0.00259149	C5AR1/PTGS2/MTOR/TNF	4
BP	GO:0001837	epithelial to mesenchymal transition	3/37	141/18670	0.00271504	0.00750025	0.00259149	IL1B/MTOR/IL6	3
BP	GO:0009411	response to UV	3/37	141/18670	0.00271504	0.00750025	0.00259149	AKT1/PTGS2/TYR	3
BP	GO:0050709	negative regulation of protein secretion	3/37	141/18670	0.00271504	0.00750025	0.00259149	IL1B/IL10/TNF	3
BP	GO:0008277	regulation of G protein-coupled receptor signaling pathway	3/37	142/18670	0.00276987	0.00763479	0.00263797	F2/NOS1/CXCL8	3
BP	GO:0038127	ERBB signaling pathway	3/37	142/18670	0.00276987	0.00763479	0.00263797	AKT1/NCF1/MMP9	3
BP	GO:0006914	autophagy	5/37	496/18670	0.00280219	0.0077068	0.00266286	AKT1/MTOR/IFNG/IL10/IL4	5
BP	GO:0061919	process utilizing autophagic mechanism	5/37	496/18670	0.00280219	0.0077068	0.00266286	AKT1/MTOR/IFNG/IL10/IL4	5
BP	GO:0006606	protein import into nucleus	3/37	143/18670	0.00282539	0.00776203	0.00268194	AKT1/PTGS2/IFNG	3
BP	GO:0019835	cytolysis	2/37	40/18670	0.00284274	0.00776684	0.0026836	F2/PRF1	2
BP	GO:0045124	regulation of bone resorption	2/37	40/18670	0.00284274	0.00776684	0.0026836	CALCA/IL6	2
BP	GO:0051281	positive regulation of release of sequestered calcium ion into cytosol	2/37	40/18670	0.00284274	0.00776684	0.0026836	F2/CXCL10	2
BP	GO:0051931	regulation of sensory perception	2/37	40/18670	0.00284274	0.00776684	0.0026836	MTOR/IL10	2
BP	GO:2000008	regulation of protein localization to cell surface	2/37	40/18670	0.00284274	0.00776684	0.0026836	AKT1/TNF	2
BP	GO:0007520	myoblast fusion	2/37	41/18670	0.00298481	0.00812821	0.00280846	NOS1/CXCL10	2
BP	GO:0043267	negative regulation of potassium ion transport	2/37	41/18670	0.00298481	0.00812821	0.00280846	NOS3/NOS1	2
BP	GO:0140353	lipid export from cell	2/37	41/18670	0.00298481	0.00812821	0.00280846	NOS2/IL1B	2
BP	GO:0042542	response to hydrogen peroxide	3/37	146/18670	0.00299606	0.00814103	0.00281289	MB/IL10/IL6	3
BP	GO:0055123	digestive system development	3/37	146/18670	0.00299606	0.00814103	0.00281289	CXCL8/RET/TNF	3
BP	GO:0071236	cellular response to antibiotic	3/37	147/18670	0.00305433	0.00829032	0.00286447	CFTR/IL10/IL6	3
BP	GO:0002792	negative regulation of peptide secretion	3/37	148/18670	0.00311329	0.00843198	0.00291342	IL1B/IL10/TNF	3
BP	GO:0061041	regulation of wound healing	3/37	148/18670	0.00311329	0.00843198	0.00291342	F2/NOS3/MTOR	3
BP	GO:0010470	regulation of gastrulation	2/37	42/18670	0.00313015	0.00844089	0.0029165	IL10/HNF4A	2
BP	GO:0031641	regulation of myelination	2/37	42/18670	0.00313015	0.00844089	0.0029165	AKT1/MTOR	2
BP	GO:0046688	response to copper ion	2/37	42/18670	0.00313015	0.00844089	0.0029165	IL1A/ICAM1	2
BP	GO:1901031	regulation of response to reactive oxygen species	2/37	42/18670	0.00313015	0.00844089	0.0029165	IL10/TNF	2
BP	GO:0006692	prostanoid metabolic process	2/37	43/18670	0.00327875	0.00876565	0.00302871	PTGS2/IL1B	2
BP	GO:0006693	prostaglandin metabolic process	2/37	43/18670	0.00327875	0.00876565	0.00302871	PTGS2/IL1B	2
BP	GO:0010863	positive regulation of phospholipase C activity	2/37	43/18670	0.00327875	0.00876565	0.00302871	EDNRA/C5AR1	2
BP	GO:0032881	regulation of polysaccharide metabolic process	2/37	43/18670	0.00327875	0.00876565	0.00302871	AKT1/MTOR	2
BP	GO:0033173	calcineurin-NFAT signaling cascade	2/37	43/18670	0.00327875	0.00876565	0.00302871	MTOR/TNF	2
BP	GO:0042088	T-helper 1 type immune response	2/37	43/18670	0.00327875	0.00876565	0.00302871	IL1B/MTOR	2
BP	GO:0045687	positive regulation of glial cell differentiation	2/37	43/18670	0.00327875	0.00876565	0.00302871	MTOR/PPARG	2
BP	GO:1901985	positive regulation of protein acetylation	2/37	43/18670	0.00327875	0.00876565	0.00302871	NOS1/IL1B	2
BP	GO:0009416	response to light stimulus	4/37	314/18670	0.00334774	0.00894048	0.00308912	AKT1/PTGS2/MTOR/TYR	4
BP	GO:0051961	negative regulation of nervous system development	4/37	316/18670	0.00342462	0.00910319	0.00314534	F2/IL1B/IL6/TNF	4
BP	GO:0042987	amyloid precursor protein catabolic process	2/37	44/18670	0.00343061	0.00910319	0.00314534	IFNG/TNF	2
BP	GO:0045601	regulation of endothelial cell differentiation	2/37	44/18670	0.00343061	0.00910319	0.00314534	IL1B/TNF	2
BP	GO:0060999	positive regulation of dendritic spine development	2/37	44/18670	0.00343061	0.00910319	0.00314534	MTOR/IL2	2
BP	GO:0061756	leukocyte adhesion to vascular endothelial cell	2/37	44/18670	0.00343061	0.00910319	0.00314534	ICAM1/TNF	2
BP	GO:0071622	regulation of granulocyte chemotaxis	2/37	44/18670	0.00343061	0.00910319	0.00314534	C5AR1/CXCL8	2
BP	GO:0070588	calcium ion transmembrane transport	4/37	319/18670	0.00354219	0.00938926	0.00324418	F2/NOS1/TLR9/CXCL10	4
BP	GO:0001974	blood vessel remodeling	2/37	45/18670	0.00358571	0.0094643	0.00327011	NOS3/TGM2	2
BP	GO:0048483	autonomic nervous system development	2/37	45/18670	0.00358571	0.0094643	0.00327011	EDNRA/RET	2
BP	GO:0071827	plasma lipoprotein particle organization	2/37	45/18670	0.00358571	0.0094643	0.00327011	ALB/PLA2G2A	2
BP	GO:1900274	regulation of phospholipase C activity	2/37	45/18670	0.00358571	0.0094643	0.00327011	EDNRA/C5AR1	2
BP	GO:0060562	epithelial tube morphogenesis	4/37	322/18670	0.00366249	0.00965671	0.00333659	EDNRA/CXCL10/RET/TNF	4
BP	GO:0060402	calcium ion transport into cytosol	3/37	158/18670	0.00374178	0.00979906	0.00338577	F2/NOS1/CXCL10	3
BP	GO:0005978	glycogen biosynthetic process	2/37	46/18670	0.00374404	0.00979906	0.00338577	AKT1/MTOR	2
BP	GO:0009250	glucan biosynthetic process	2/37	46/18670	0.00374404	0.00979906	0.00338577	AKT1/MTOR	2
BP	GO:0060711	labyrinthine layer development	2/37	46/18670	0.00374404	0.00979906	0.00338577	AKT1/IL10	2
BP	GO:0071354	cellular response to interleukin-6	2/37	46/18670	0.00374404	0.00979906	0.00338577	ICAM1/IL6	2
BP	GO:0097720	calcineurin-mediated signaling	2/37	46/18670	0.00374404	0.00979906	0.00338577	MTOR/TNF	2
BP	GO:1900015	regulation of cytokine production involved in inflammatory response	2/37	46/18670	0.00374404	0.00979906	0.00338577	F2/NOS2	2
CC	GO:0045121	membrane raft	6/37	315/19717	2.42816e-05	0.00110698	0.000833846	NOS3/NOS1/PTGS2/ICAM1/RET/TNF	6
CC	GO:0098857	membrane microdomain	6/37	316/19717	2.47181e-05	0.00110698	0.000833846	NOS3/NOS1/PTGS2/ICAM1/RET/TNF	6
CC	GO:0098589	membrane region	6/37	328/19717	3.04674e-05	0.00110698	0.000833846	NOS3/NOS1/PTGS2/ICAM1/RET/TNF	6
MF	GO:0005126	cytokine receptor binding	12/37	286/17696	3.26086e-13	5.386e-11	3.50003e-11	CD40LG/TLR9/CXCL10/CXCL8/IL1A/IL1B/IFNG/IL2/IL10/IL6/IL4/TNF	12
MF	GO:0005125	cytokine activity	11/37	220/17696	5.49592e-13	5.386e-11	3.50003e-11	CD40LG/CXCL10/CXCL8/IL1A/IL1B/IFNG/IL2/IL10/IL6/IL4/TNF	11
MF	GO:0048018	receptor ligand activity	13/37	482/17696	7.59157e-12	4.23378e-10	2.75127e-10	CALCA/F2/CD40LG/CXCL10/CXCL8/IL1A/IL1B/IFNG/IL2/IL10/IL6/IL4/TNF	13
MF	GO:0030546	signaling receptor activator activity	13/37	487/17696	8.64036e-12	4.23378e-10	2.75127e-10	CALCA/F2/CD40LG/CXCL10/CXCL8/IL1A/IL1B/IFNG/IL2/IL10/IL6/IL4/TNF	13
MF	GO:0070851	growth factor receptor binding	7/37	134/17696	1.03881e-08	4.07212e-07	2.64622e-07	TLR9/IL1A/IL1B/IL2/IL10/IL6/IL4	7
MF	GO:0016653	oxidoreductase activity, acting on NAD(P)H, heme protein as acceptor	3/37	13/17696	2.37205e-06	7.64976e-05	4.97111e-05	NOS3/NOS1/NOS2	3
MF	GO:0031406	carboxylic acid binding	6/37	193/17696	2.73206e-06	7.64976e-05	4.97111e-05	ALB/NOS3/NOS1/NOS2/PPARG/HNF4A	6
MF	GO:0043177	organic acid binding	6/37	205/17696	3.87099e-06	9.06409e-05	5.8902e-05	ALB/NOS3/NOS1/NOS2/PPARG/HNF4A	6
MF	GO:0005149	interleukin-1 receptor binding	3/37	16/17696	4.62454e-06	9.06409e-05	5.8902e-05	TLR9/IL1A/IL1B	3
MF	GO:0010181	FMN binding	3/37	16/17696	4.62454e-06	9.06409e-05	5.8902e-05	NOS3/NOS1/NOS2	3
MF	GO:0020037	heme binding	5/37	135/17696	8.59404e-06	0.00015313	9.951e-05	MB/NOS3/NOS1/PTGS2/NOS2	5
MF	GO:0046906	tetrapyrrole binding	5/37	145/17696	1.21641e-05	0.000198681	0.000129111	MB/NOS3/NOS1/PTGS2/NOS2	5
MF	GO:0016705	oxidoreductase activity, acting on paired donors, with incorporation or reduction of molecular oxygen	5/37	159/17696	1.89994e-05	0.000286453	0.000186148	NOS3/NOS1/PTGS2/NOS2/TYR	5
MF	GO:0008083	growth factor activity	5/37	163/17696	2.14168e-05	0.000299835	0.000194844	F2/IL2/IL10/IL6/IL4	5
MF	GO:0005504	fatty acid binding	3/37	34/17696	4.81515e-05	0.000629179	0.000408865	ALB/PPARG/HNF4A	3
MF	GO:0004497	monooxygenase activity	4/37	99/17696	5.28234e-05	0.000647087	0.000420502	NOS3/NOS1/NOS2/TYR	4
MF	GO:0016651	oxidoreductase activity, acting on NAD(P)H	4/37	107/17696	7.15575e-05	0.000795012	0.00051663	NOS3/NOS1/NCF1/NOS2	4
MF	GO:0016709	oxidoreductase activity, acting on paired donors, with incorporation or reduction of molecular oxygen, NAD(P)H as one donor, and incorporation of one atom of oxygen	3/37	39/17696	7.30113e-05	0.000795012	0.00051663	NOS3/NOS1/NOS2	3
MF	GO:0050661	NADP binding	3/37	52/17696	0.000173284	0.00178756	0.00116163	NOS3/NOS1/NOS2	3
MF	GO:0045236	CXCR chemokine receptor binding	2/37	11/17696	0.000231199	0.00224818	0.00146095	CXCL10/CXCL8	2
MF	GO:0005507	copper ion binding	3/37	59/17696	0.000252346	0.00224818	0.00146095	ALB/IL1A/TYR	3
MF	GO:0016597	amino acid binding	3/37	59/17696	0.000252346	0.00224818	0.00146095	NOS3/NOS1/NOS2	3
MF	GO:0033293	monocarboxylic acid binding	3/37	64/17696	0.000321094	0.00273628	0.00177814	ALB/PPARG/HNF4A	3
MF	GO:0050660	flavin adenine dinucleotide binding	3/37	79/17696	0.000596445	0.00487097	0.00316534	NOS3/NOS1/NOS2	3
MF	GO:0005516	calmodulin binding	4/37	200/17696	0.00078091	0.00612234	0.00397853	AKT1/NOS3/NOS1/NOS2	4
MF	GO:0001848	complement binding	2/37	21/17696	0.000871207	0.00656756	0.00426785	C5AR1/CRP	2
